# Supplementary material for: New 2-pyridone-based donor–acceptor dyes: the effect of the donor group position, type of π-linker and acid–base characteristics of the medium on the photophysical properties
Source: Royal Society of Chemistry journal article supplement (doi:10.1039/d4ob00177j), 2024-01-01
Supplement: d4ob00177j1.pdf [file d4ob00177j1.pdf]

# **New 2-Pyridone-Based Donor-Acceptor Dyes: The Effect of Donor Group Position, Type of $\pi$ -linker and Acid-Base Characteristics of a Medium on the Photophysical Properties**

Saveliy P. Sorokin,\* Mikhail Yu. Ievlev, Oleg V. Ershov

*Chuvash State University named after I.N. Ulyanov, Moskovsky pr., 15,  
Cheboksary, Russia*

*\*Corresponding author. E-mail address: [ssp\\_9999@mail.ru](mailto:ssp_9999@mail.ru) (S.P. Sorokin)*

## **Contents:**

|                                                                                                                                          |           |
|------------------------------------------------------------------------------------------------------------------------------------------|-----------|
| <b>1. (Fluoro)solvatochromism of compound 4 in different solvents. ....</b>                                                              | <b>2</b>  |
| <b>2. Quantum-chemical calculations details for compounds 4, 6 and 7. ....</b>                                                           | <b>4</b>  |
| <b>3. Absorption spectra and emission spectra of compounds 1-5, 7 in THF and DCM .....</b>                                               | <b>10</b> |
| <b>4. Absorption spectra and emission spectra of compounds 1-7 in DMSO (<math>10^{-5}</math> M) in the presence of TFA and DBN. ....</b> | <b>12</b> |
| <b>5. NMR-spectra of compounds 1-7. ....</b>                                                                                             | <b>15</b> |
| <b>6. Mass spectra of compounds 1-7. ....</b>                                                                                            | <b>25</b> |
| <b>7. References. ....</b>                                                                                                               | <b>29</b> |

# 1. (Fluoro)solvatochromism of compound 4 in different solvents.

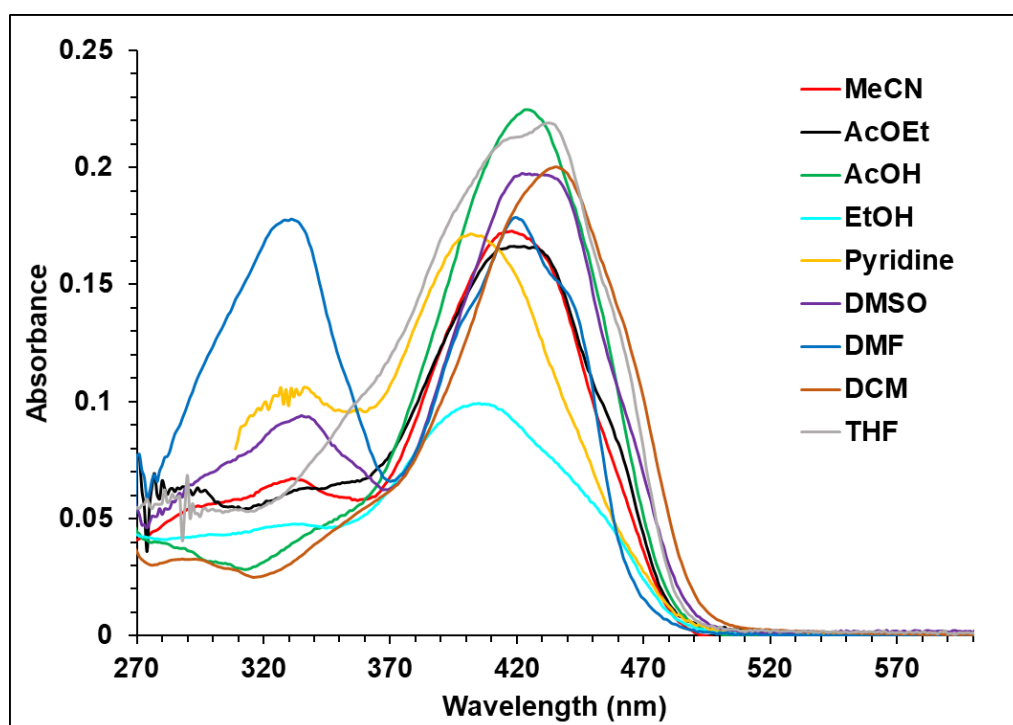

Figure S1. Absorption spectra of compound 4 in various solvents ( $10^{-5}$  M).

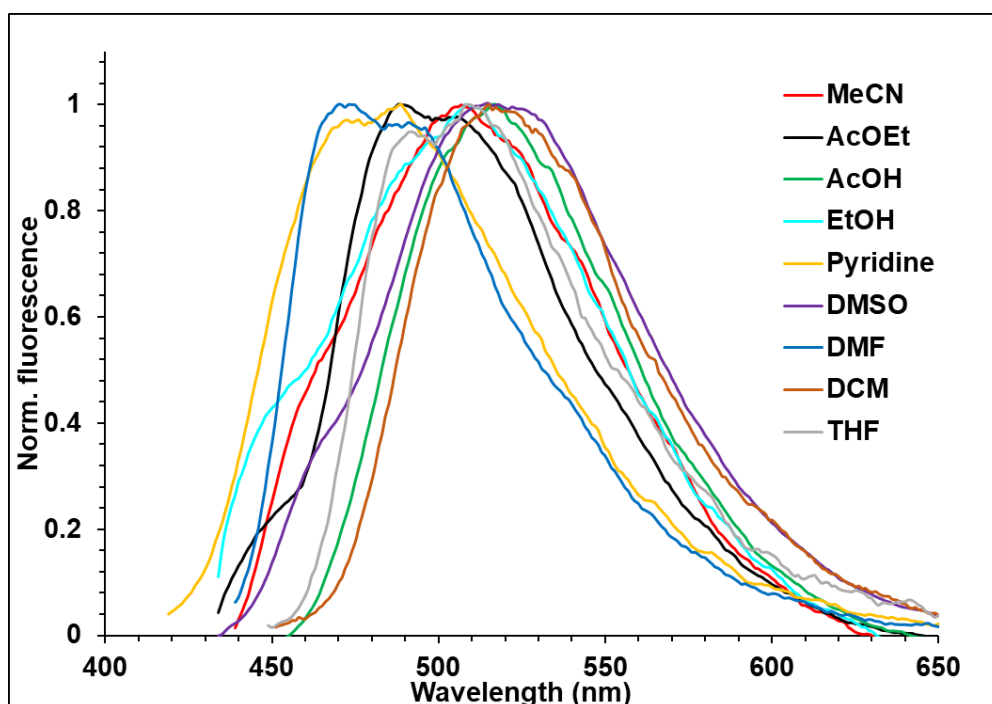

Figure S2. Emission spectra of compounds 4 in various solvents ( $10^{-5}$  M), long-wavelength absorption maxima were used for excitation.

**Table S1.** Photophysical properties of compound **4** in various solvents.

| Solvent      | $\lambda_{\text{abs(max)}}$ ,<br>nm <sup>[a]</sup> | $\epsilon_{\text{(max)}}$ ,<br>M <sup>-1</sup> cm <sup>-1</sup> | $\lambda_{\text{em (max)}}$ ,<br>nm <sup>[b]</sup> | FWHM <sub>em</sub> , nm<br>(cm <sup>-1</sup> ) | Stokes shift |                  | $\Phi_{\text{em}}^{[c]}$ ,<br>% |
|--------------|----------------------------------------------------|-----------------------------------------------------------------|----------------------------------------------------|------------------------------------------------|--------------|------------------|---------------------------------|
|              |                                                    |                                                                 |                                                    |                                                | nm           | cm <sup>-1</sup> |                                 |
| Acetonitrile | 331, 418                                           | 6700,<br>17300                                                  | 507                                                | 94 (3650)                                      | 89           | 4200             | 1.2                             |
| Ethylacetate | 419                                                | 16600                                                           | 488                                                | 80 (3150)                                      | 69           | 3350             | 2.4                             |
| Acetic acid  | 424                                                | 22500                                                           | 517                                                | 78 (2900)                                      | 93           | 4250             | 2.4                             |
| Ethanol      | 405                                                | 9900                                                            | 508                                                | 97 (3800)                                      | 103          | 5000             | 2.2                             |
| Pyridine     | 403                                                | 17200                                                           | 489                                                | 89 (3750)                                      | 86           | 4350             | 5.0                             |
| DMSO         | 336, 424                                           | 9400,<br>19800                                                  | 515                                                | 92 (3400)                                      | 92           | 4200             | 4.3                             |
| DMF          | 331, 420                                           | 17800,<br>17850                                                 | 470                                                | 78 (3250)                                      | 50           | 2550             | 3.5                             |
| THF          | 432                                                | 21900                                                           | 509                                                | 80 (3050)                                      | 77           | 3500             | 2.7                             |
| DCM          | 435                                                | -                                                               | 515                                                | 79 (2900)                                      | 80           | 3550             | 1.1                             |

<sup>[a]</sup> Absorption spectra of solutions were registered at 10<sup>-5</sup> M.

<sup>[b]</sup> Emission spectra of solutions were registered at 10<sup>-5</sup> M, long-wavelength absorption maxima were used for excitation.

<sup>[c]</sup> Relative quantum yield was estimated using fluorescein in 0.05 M KOH in ethanol at 425 nm excitation wavelength ( $\Phi_{\text{em}}=0.97$ ) [1].

## 2. Quantum-chemical calculations details for compounds 4, 6 and 7.

Calculations were performed in Gaussian 09, rev. D.01 [2] at PBE0/6-311G (d,p) theory level

**Table S2.** Optimized geometry for compound 6

|                                                                                    |          |          |          |
|------------------------------------------------------------------------------------|----------|----------|----------|
| %nprocshared=4<br>%mem=11000MB<br>#opt freq=noraman pbe1pbe /6-311+g(d,p)<br>0 1   |          |          |          |
| 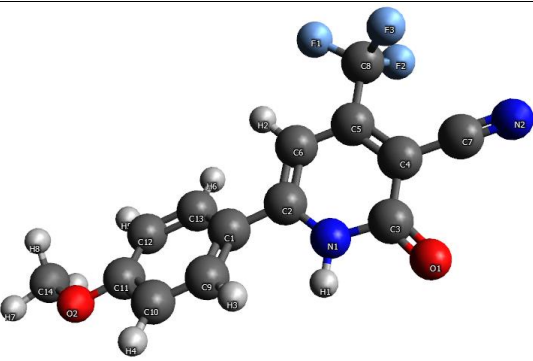 |          |          |          |
| Energy: -688643.1158598                                                            |          |          |          |
| C                                                                                  | 1.63651  | 0.30972  | 0.03085  |
| C                                                                                  | 0.17725  | 0.42600  | -0.01547 |
| N                                                                                  | -0.35753 | 1.66428  | -0.14808 |
| C                                                                                  | -1.71752 | 1.99797  | -0.18931 |
| C                                                                                  | -2.59751 | 0.83867  | -0.08933 |
| C                                                                                  | -2.06470 | -0.42762 | 0.03656  |
| C                                                                                  | -0.67892 | -0.64686 | 0.08305  |
| O                                                                                  | -2.05703 | 3.15477  | -0.31172 |
| C                                                                                  | -3.99105 | 1.10172  | -0.14084 |
| C                                                                                  | -2.98613 | -1.62727 | 0.14180  |
| N                                                                                  | -5.12216 | 1.32871  | -0.18370 |
| F                                                                                  | -2.29239 | -2.76714 | 0.27910  |
| F                                                                                  | -3.74217 | -1.75373 | -0.95215 |
| F                                                                                  | -3.79825 | -1.52870 | 1.19681  |
| C                                                                                  | 2.42792  | 1.30770  | 0.61984  |
| C                                                                                  | 3.80114  | 1.19056  | 0.66407  |
| C                                                                                  | 4.43014  | 0.06848  | 0.11346  |
| C                                                                                  | 3.65673  | -0.93350 | -0.47649 |
| C                                                                                  | 2.27601  | -0.80599 | -0.51077 |
| O                                                                                  | 5.77167  | 0.04495  | 0.19996  |
| C                                                                                  | 6.46309  | -1.06896 | -0.32976 |
| H                                                                                  | 0.25569  | 2.45800  | -0.28419 |
| H                                                                                  | -0.28677 | -1.64054 | 0.23593  |
| H                                                                                  | 1.96355  | 2.17057  | 1.08825  |
| H                                                                                  | 4.41490  | 1.95124  | 1.13265  |
| H                                                                                  | 4.11842  | -1.80629 | -0.92035 |
| H                                                                                  | 1.68938  | -1.57903 | -0.99582 |
| H                                                                                  | 7.51926  | -0.87844 | -0.14668 |
| H                                                                                  | 6.16946  | -1.99589 | 0.17485  |
| H                                                                                  | 6.29446  | -1.16588 | -1.40783 |

**Table S3.** Calculated vertical excitations for compound **6**

| %nprocshared=4<br>%mem=11000MB<br># td=(nstates=6) pbe1pbe /6-311+g(d,p) guess=read geom=check |                 |               |                                     |                                  |
|------------------------------------------------------------------------------------------------|-----------------|---------------|-------------------------------------|----------------------------------|
| No.                                                                                            | Wavelength (nm) | Osc. Strength | Major contribs                      | Minor contribs                   |
| 1                                                                                              | <b>359.0518</b> | <b>0.5721</b> | <b>HOMO-&gt;LUMO (99%)</b>          |                                  |
| 2                                                                                              | 298.6491        | 0.0156        | H-2->LUMO (50%), H-1->LUMO (48%)    |                                  |
| 3                                                                                              | 289.5542        | 0.0468        | H-2->LUMO (48%), H-1->LUMO (49%)    |                                  |
| 4                                                                                              | 271.3477        | 0.006         | H-3->LUMO (33%),<br>HOMO->L+1 (58%) | HOMO->L+2 (4%)                   |
| 5                                                                                              | 253.8423        | 0.0116        | H-3->LUMO (48%),<br>HOMO->L+1 (38%) | H-1->L+1 (2%),<br>HOMO->L+2 (8%) |
| 6                                                                                              | 246.7298        | 0.0901        | H-3->LUMO (12%),<br>HOMO->L+2 (77%) | H-4->LUMO (6%)                   |

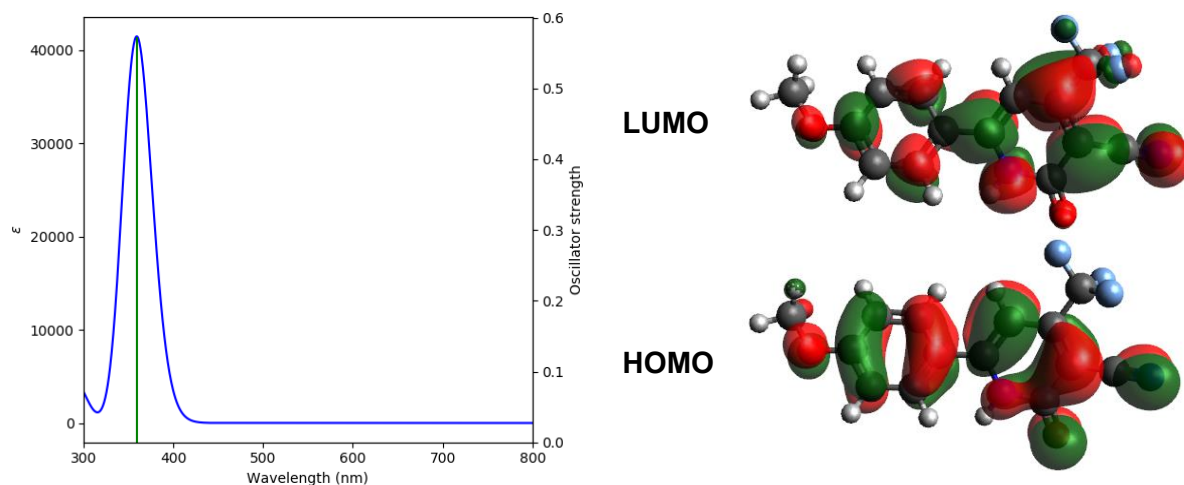**Figure S3.** Calculated absorption spectrum of compound **6** and frontier orbital distributions (HOMO, LUMO) involved in the first excitation

**Table S4.** Optimized geometry for compound 4

%nprocshared=4  
%mem=11000MB  
#opt freq=noraman pbe1pbe /6-311+g(d,p)

0 1

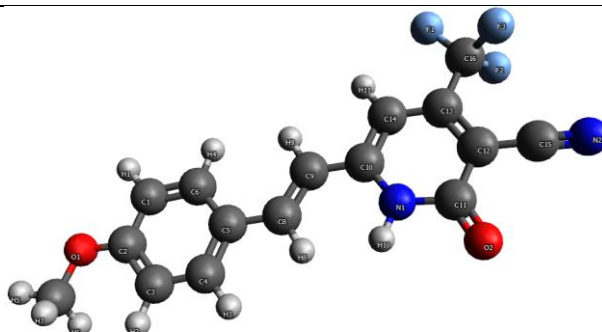

Energy: -737169.5883826

|   |          |          |          |
|---|----------|----------|----------|
| C | 4.83614  | -1.43870 | -0.00060 |
| C | 5.78613  | -0.40699 | -0.00028 |
| C | 5.35888  | 0.92061  | -0.00004 |
| C | 3.99907  | 1.19790  | -0.00004 |
| C | 3.03540  | 0.18446  | -0.00030 |
| C | 3.49202  | -1.14671 | -0.00060 |
| O | 7.07347  | -0.79668 | -0.00037 |
| C | 8.07806  | 0.19756  | 0.00167  |
| C | 1.63285  | 0.54922  | -0.00027 |
| C | 0.57366  | -0.28532 | -0.00053 |
| C | -0.81712 | 0.10217  | -0.00043 |
| N | -1.17774 | 1.41095  | -0.00042 |
| C | -2.47707 | 1.92815  | -0.00022 |
| C | -3.51302 | 0.89969  | 0.00001  |
| C | -3.16280 | -0.43563 | -0.00008 |
| C | -1.82231 | -0.84458 | -0.00031 |
| O | -2.65512 | 3.12719  | -0.00022 |
| C | -4.85458 | 1.35954  | 0.00036  |
| C | -4.24312 | -1.49892 | 0.00024  |
| N | -5.94257 | 1.74629  | 0.00040  |
| F | -3.71759 | -2.73266 | -0.00044 |
| F | -5.02244 | -1.40006 | -1.08000 |
| F | -5.02107 | -1.40066 | 1.08153  |
| H | 5.18947  | -2.46367 | -0.00078 |
| H | 6.06936  | 1.73754  | 0.00008  |
| H | 3.67654  | 2.23530  | 0.00014  |
| H | 2.78308  | -1.96761 | -0.00080 |
| H | 9.02681  | -0.33665 | 0.00289  |
| H | 8.01737  | 0.82606  | -0.89362 |
| H | 8.01455  | 0.82520  | 0.89736  |
| H | 1.46318  | 1.62557  | 0.00003  |
| H | 0.72908  | -1.35906 | -0.00077 |
| H | -0.46995 | 2.13249  | -0.00059 |
| H | -1.56742 | -1.89409 | -0.00034 |

**Table S5.** Calculated vertical excitations for compound **4**

| %nprocshared=4<br>%mem=11000MB<br># td=(nstates=6) pbe1pbe /6-311+g(d,p) guess=read geom=check |                 |               |                                     |                                |
|------------------------------------------------------------------------------------------------|-----------------|---------------|-------------------------------------|--------------------------------|
| No.                                                                                            | Wavelength (nm) | Osc. Strength | Major contribs                      | Minor contribs                 |
| <b>1</b>                                                                                       | <b>408.5954</b> | <b>1.0808</b> | <b>HOMO-&gt;LUMO (99%)</b>          |                                |
| 2                                                                                              | 334.3695        | 0.0467        | H-1->LUMO (95%)                     |                                |
| 3                                                                                              | 314.5849        | 0             | H-2->LUMO (97%)                     | H-2->L+1 (2%)                  |
| 4                                                                                              | 288.4561        | 0.0006        | H-3->LUMO (77%),<br>HOMO->L+2 (16%) | H-1->L+2 (2%), HOMO->L+1 (3%)  |
| 5                                                                                              | 273.2856        | 0.1418        | HOMO->L+1 (86%)                     | H-5->LUMO (3%), H-3->LUMO (5%) |
| 6                                                                                              | 257.1966        | 0.1065        | H-3->LUMO (17%),<br>HOMO->L+2 (73%) | H-3->L+1 (2%)                  |

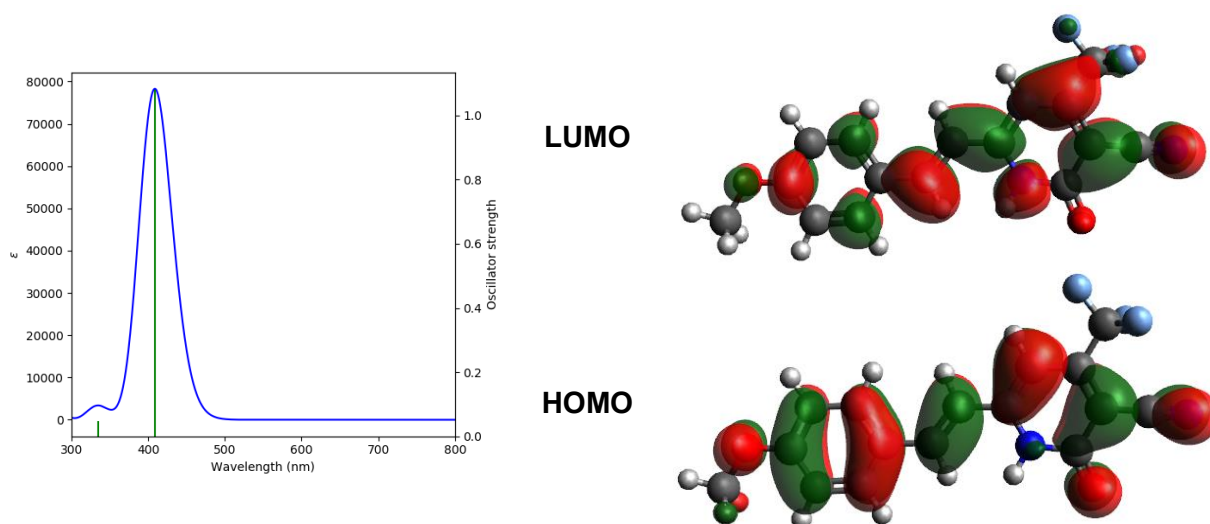**Figure S4.** Calculated absorption spectrum of compound **4** and frontier orbital distributions (HOMO, LUMO) involved in the first excitation

**Table S6.** Optimized geometry for compound 7

%nprocshared=4  
%mem=11000MB  
#opt freq=noraman pbe1pbe /6-311+g(d,p)

0 1

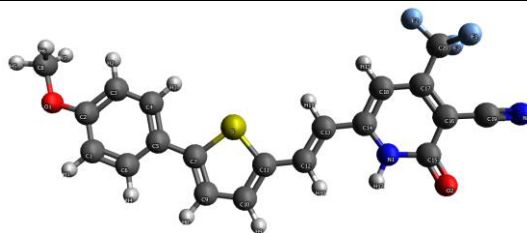

Energy: -1083195.0268180

|   |          |          |          |
|---|----------|----------|----------|
| C | 7.23727  | -0.65557 | 0.00034  |
| C | 7.35328  | 0.73863  | 0.00021  |
| C | 6.19741  | 1.51880  | -0.00002 |
| C | 4.95297  | 0.90427  | -0.00014 |
| C | 4.81588  | -0.48587 | -0.00003 |
| C | 5.99498  | -1.25139 | 0.00023  |
| C | 3.50945  | -1.13057 | -0.00017 |
| O | 8.60945  | 1.22807  | 0.00035  |
| C | 8.78208  | 2.62953  | -0.00006 |
| C | 3.21281  | -2.47827 | -0.00062 |
| C | 1.83516  | -2.75086 | -0.00066 |
| C | 1.04611  | -1.61856 | -0.00025 |
| S | 2.04569  | -0.19659 | 0.00022  |
| C | -0.38164 | -1.57993 | -0.00023 |
| C | -1.15985 | -0.47339 | 0.00005  |
| C | -2.59958 | -0.44332 | 0.00007  |
| N | -3.32311 | -1.59282 | 0.00021  |
| C | -4.71695 | -1.71273 | 0.00022  |
| C | -5.41193 | -0.42887 | 0.00001  |
| C | -4.69043 | 0.74895  | -0.00010 |
| C | -3.28972 | 0.75396  | -0.00008 |
| O | -5.23310 | -2.80945 | 0.00036  |
| C | -6.82890 | -0.48190 | 0.00002  |
| N | -7.98233 | -0.53800 | 0.00052  |
| C | -5.41735 | 2.07905  | -0.00016 |
| F | -6.19169 | 2.21036  | -1.08045 |
| F | -4.55759 | 3.10865  | -0.00058 |
| F | -6.19104 | 2.21070  | 1.08059  |
| H | 8.14380  | -1.25030 | 0.00054  |
| H | 6.25223  | 2.60018  | -0.00010 |
| H | 4.06975  | 1.53601  | -0.00036 |
| H | 5.93967  | -2.33407 | 0.00037  |
| H | 9.85786  | 2.79873  | -0.00017 |
| H | 8.34452  | 3.08525  | -0.89546 |
| H | 8.34461  | 3.08577  | 0.89511  |
| H | 3.96942  | -3.25165 | -0.00095 |
| H | 1.41652  | -3.75068 | -0.00101 |
| H | -0.83533 | -2.57021 | -0.00051 |
| H | -0.69292 | 0.50709  | 0.00023  |
| H | -2.85461 | -2.48828 | 0.00046  |
| H | -2.74280 | 1.68526  | -0.00023 |



**Table S7.** Calculated vertical excitations for compound **7**

| %nprocshared=4<br>%mem=11000MB<br># td=(nstates=6) pbe1pbe /6-311+g(d,p) guess=read geom=check |                 |               |                             |                                   |
|------------------------------------------------------------------------------------------------|-----------------|---------------|-----------------------------|-----------------------------------|
| No.                                                                                            | Wavelength (nm) | Osc. Strength | Major contribs              | Minor contribs                    |
| <b>1</b>                                                                                       | <b>473.2402</b> | <b>1.3707</b> | <b>HOMO-&gt;LUMO (100%)</b> |                                   |
| 2                                                                                              | 375.3684        | 0.0496        | H-1->LUMO (93%)             | HOMO->L+1 (4%)                    |
| 3                                                                                              | 322.6067        | 0.075         | HOMO->L+1 (92%)             | H-1->LUMO (4%)                    |
| 4                                                                                              | 319.8437        | 0             | H-4->LUMO (95%)             | H-4->L+1 (4%)                     |
| 5                                                                                              | 311.7139        | 0.0329        | H-2->LUMO (87%)             | H-5->LUMO (5%),<br>H-3->LUMO (4%) |
| 6                                                                                              | 294.5273        | 0.0582        | H-3->LUMO (78%)             | H-2->LUMO (5%),<br>HOMO->L+2 (9%) |

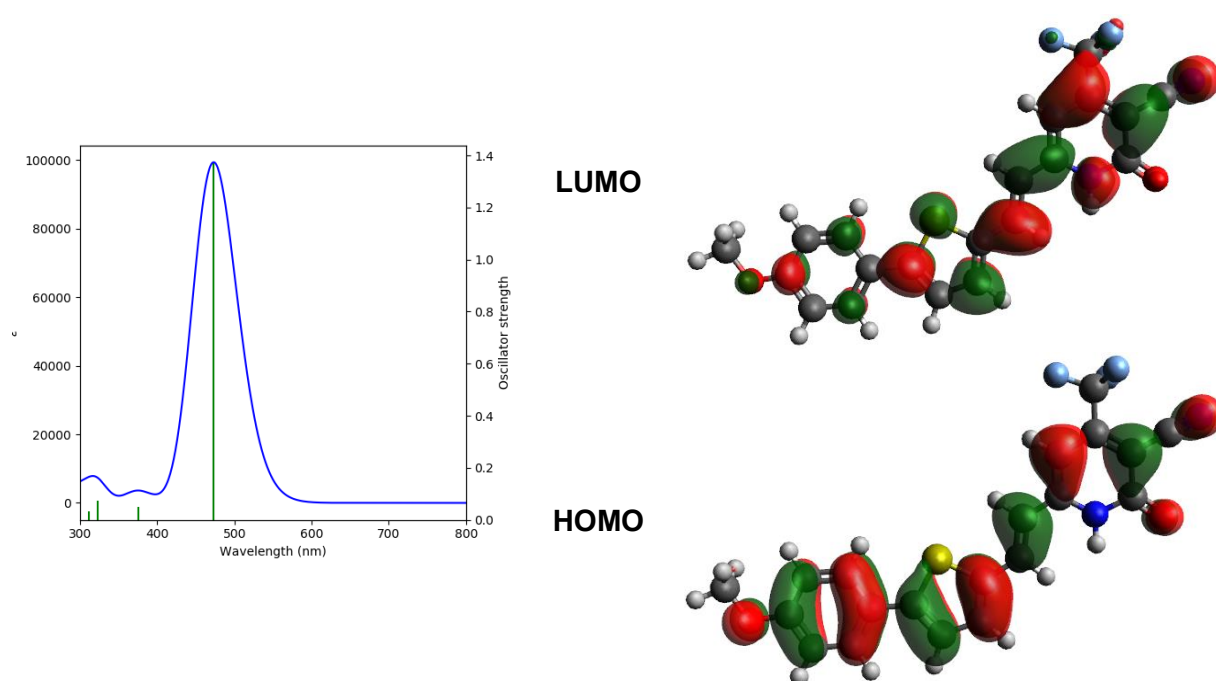**Figure S5.** Calculated absorption spectrum of compound **7** and frontier orbital distributions (HOMO, LUMO) involved in the first excitation

### 3. Absorption spectra and emission spectra of compounds 1-5, 7 in THF and DCM

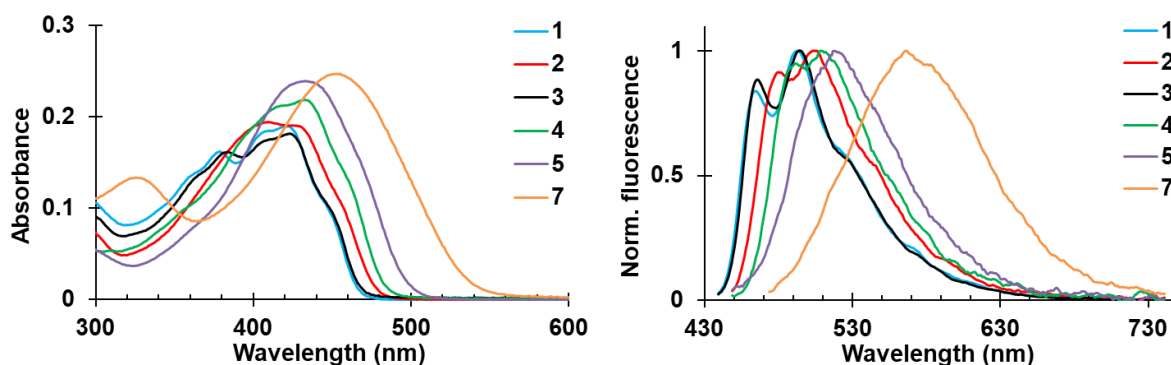

**Figure S6.** Absorption and emission spectra of compounds **1-5, 7** in THF ( $10^{-5}$  M).

**Table S8.** Photophysical properties of compounds **1-5, 7** in THF.

| Compound | $\lambda_{\text{abs(max)}}$ ,<br>nm <sup>[a]</sup> | $\epsilon_{\text{(max)}}$ ,<br>M <sup>-1</sup> cm <sup>-1</sup> | $\lambda_{\text{em(max)}}$ , nm <sup>[b]</sup> | FWHM <sub>em</sub> ,<br>nm (cm <sup>-1</sup> ) | Stokes shift |                  | $\Phi_{\text{em}}^{[c]}$ ,<br>% |
|----------|----------------------------------------------------|-----------------------------------------------------------------|------------------------------------------------|------------------------------------------------|--------------|------------------|---------------------------------|
|          |                                                    |                                                                 |                                                |                                                | nm           | cm <sup>-1</sup> |                                 |
| 1        | 422                                                | 18950                                                           | 464, 493                                       | 80 (3300)                                      | 71           | 3400             | 7.8                             |
| 2        | 409                                                | 19450                                                           | 482, 504                                       | 83 (3250)                                      | 95           | 4600             | 4.2                             |
| 3        | 423                                                | 18150                                                           | 465, 494                                       | 79 (3250)                                      | 71           | 3400             | 9.6                             |
| 4        | 432                                                | 21900                                                           | 494, 509                                       | 80 (3050)                                      | 77           | 3500             | 2.7                             |
| 5        | 433                                                | 23950                                                           | 518                                            | 80 (2900)                                      | 85           | 3800             | 1.6                             |
| 7        | 455                                                | 24750                                                           | 566                                            | 106 (3250)                                     | 111          | 4300             | 1.4                             |

<sup>[a]</sup> Absorption spectra of solutions were registered at  $10^{-5}$  M.

<sup>[b]</sup> Emission spectra of solutions were registered at  $10^{-5}$  M, long-wavelength absorption maxima were used for excitation.

<sup>[c]</sup> Relative quantum yield was estimated using fluorescein in 0.05 M KOH in ethanol at 425 nm and 450 nm excitation wavelengths ( $\Phi_{\text{em}}=0.97$ ) [1].

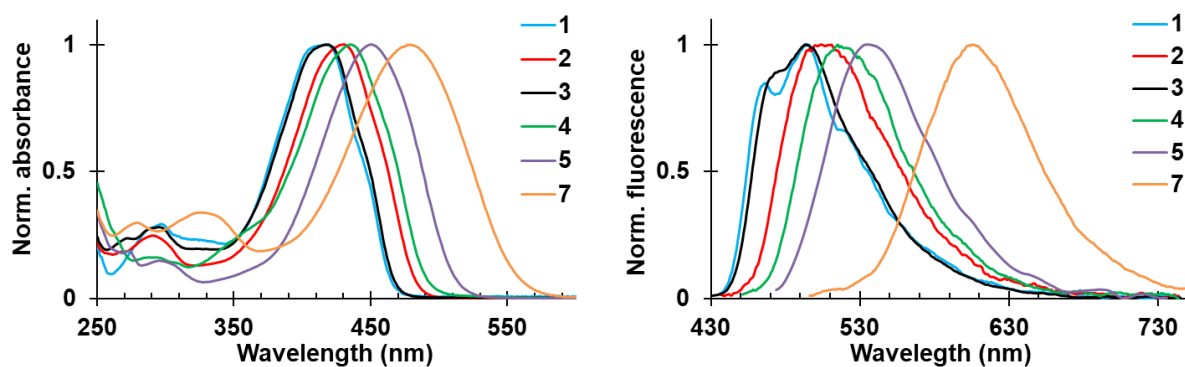

**Figure S7.** Absorption and emission spectra of compounds **1-5, 7** in DCM.

**Table S9.** Photophysical properties of compounds **1-5, 7** in DCM.

| Compound | $\lambda_{\text{abs(max)}}$ ,<br>nm | $\epsilon_{\text{(max)}}$ ,<br>$\text{M}^{-1} \text{cm}^{-1}$ | $\lambda_{\text{em(max)}}$ , nm <sup>[a]</sup> | FWHM <sub>em</sub> ,<br>nm ( $\text{cm}^{-1}$ ) | Stokes shift |                  | $\Phi_{\text{em}}^{\text{[b]}}$ ,<br>% |
|----------|-------------------------------------|---------------------------------------------------------------|------------------------------------------------|-------------------------------------------------|--------------|------------------|----------------------------------------|
|          |                                     |                                                               |                                                |                                                 | nm           | $\text{cm}^{-1}$ |                                        |
| 1        | 417                                 | -                                                             | 466, 495                                       | 81 (3350)                                       | 78           | 3800             | 5.3                                    |
| 2        | 430                                 | -                                                             | 504                                            | 84 (3200)                                       | 74           | 3400             | 1.0                                    |
| 3        | 417                                 | -                                                             | 494                                            | 79 (3200)                                       | 77           | 3750             | 6.4                                    |
| 4        | 435                                 | -                                                             | 515                                            | 79 (2900)                                       | 80           | 3550             | 1.1                                    |
| 5        | 450                                 | -                                                             | 534                                            | 80 (2700)                                       | 84           | 3500             | 1.0                                    |
| 7        | 479                                 | -                                                             | 605                                            | 87 (2350)                                       | 126          | 4350             | 1.6                                    |

<sup>[a]</sup> Emission spectra of solutions were registered using long-wavelength absorption maxima for excitation.

<sup>[b]</sup> Relative quantum yield was estimated using fluorescein in 0.05 M KOH in ethanol at 425 nm and 450 nm excitation wavelengths ( $\Phi_{\text{em}}=0.97$ ) [1].

#### 4. Absorption spectra and emission spectra of compounds 1-7 in DMSO ( $10^{-5}$ M) in the presence of TFA and DBN.

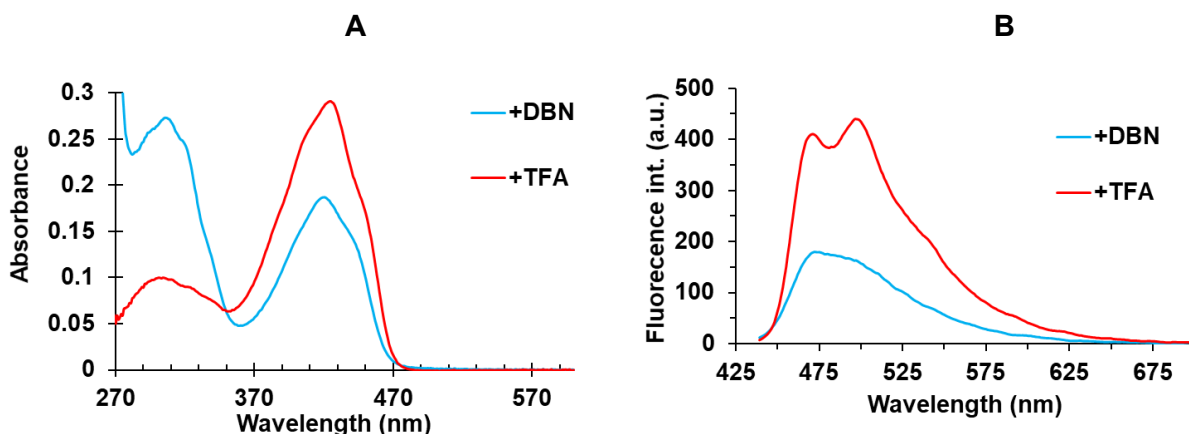

**Figure S8.** Absorption spectra (A) and emission spectra (B) of **1** solution in DMSO ( $C = 10^{-5}$  M) with the addition of DBN (blue line), with the addition of TFA (red line).

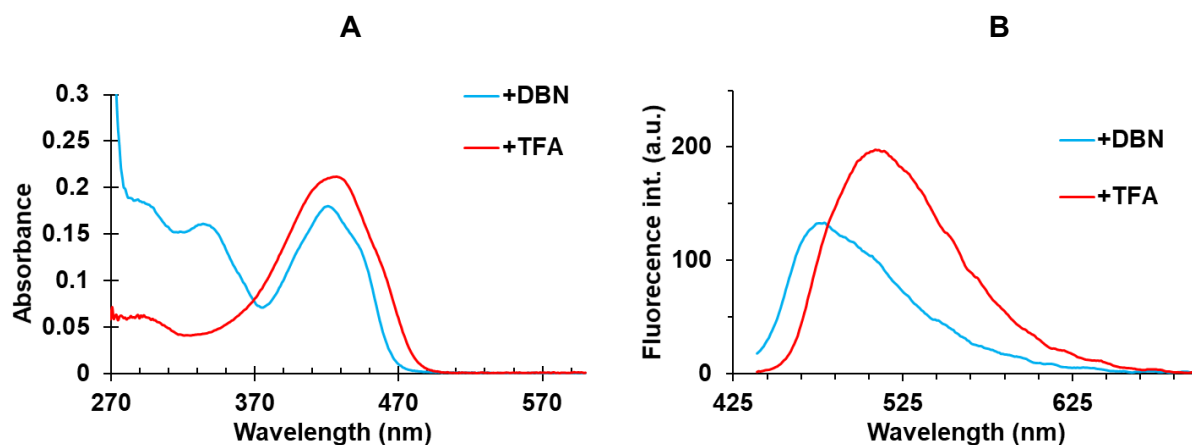

**Figure S9.** Absorption spectra (A) and emission spectra (B) of **2** solution in DMSO ( $C = 10^{-5}$  M) with the addition of DBN (blue line), with the addition of TFA (red line).

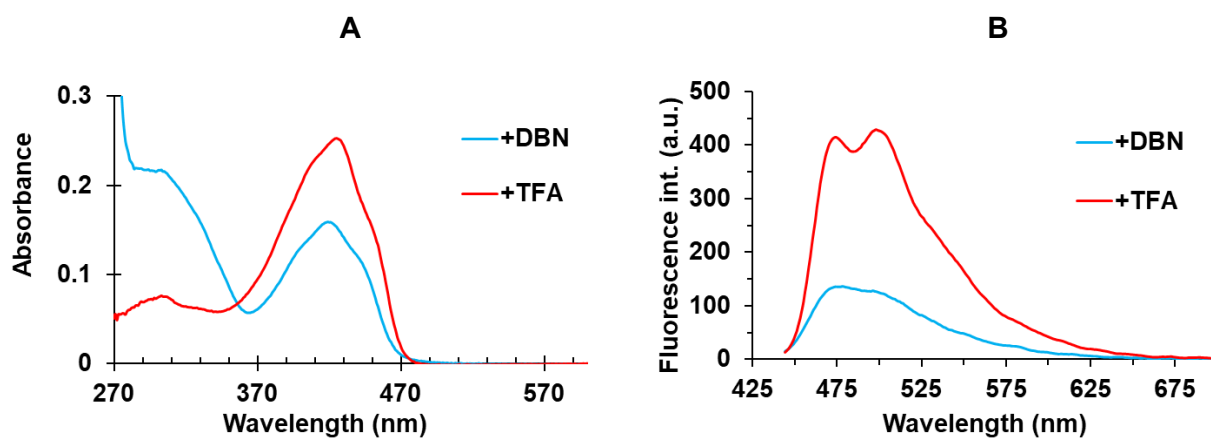

**Figure S10.** Absorption spectra (A) and emission spectra (B) of **3** solution in DMSO ( $C = 10^{-5}$  M) with the addition of DBN (blue line), with the addition of TFA (red line).

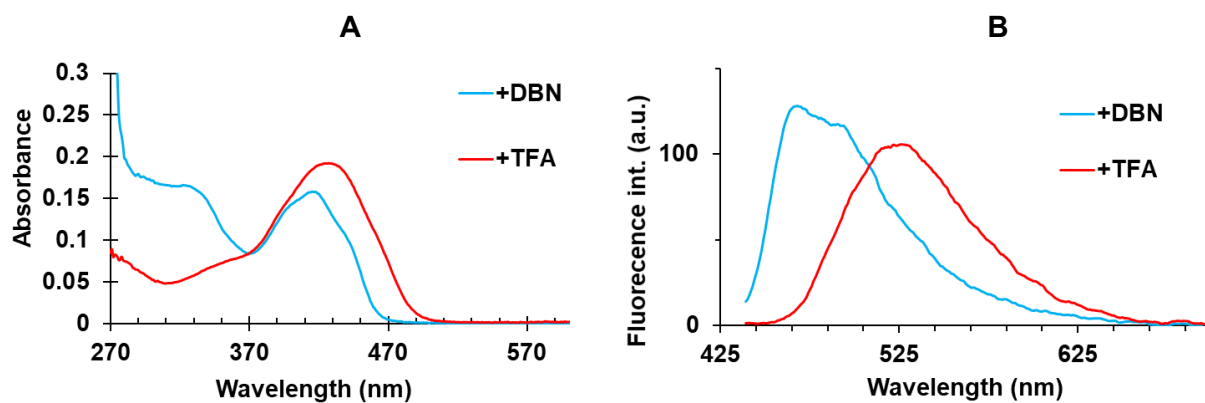

**Figure S11.** Absorption spectra (A) and emission spectra (B) of **4** solution in DMSO ( $C = 10^{-5}$  M) with the addition of DBN (blue line), with the addition of TFA (red line).

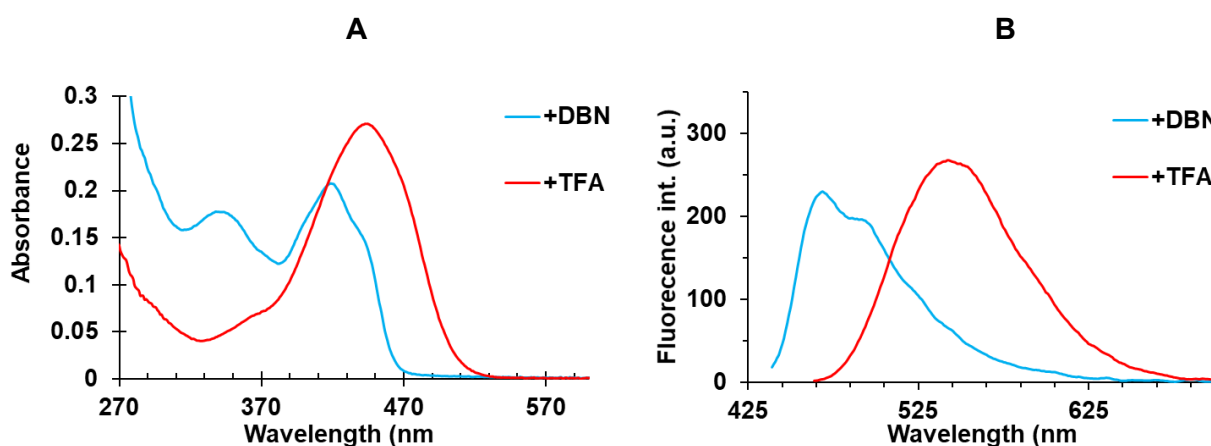

**Figure S12.** Absorption spectra (A) and emission spectra (B) of **5** solution in DMSO ( $C = 10^{-5}$  M) with the addition of DBN (blue line), with the addition of TFA (red line).

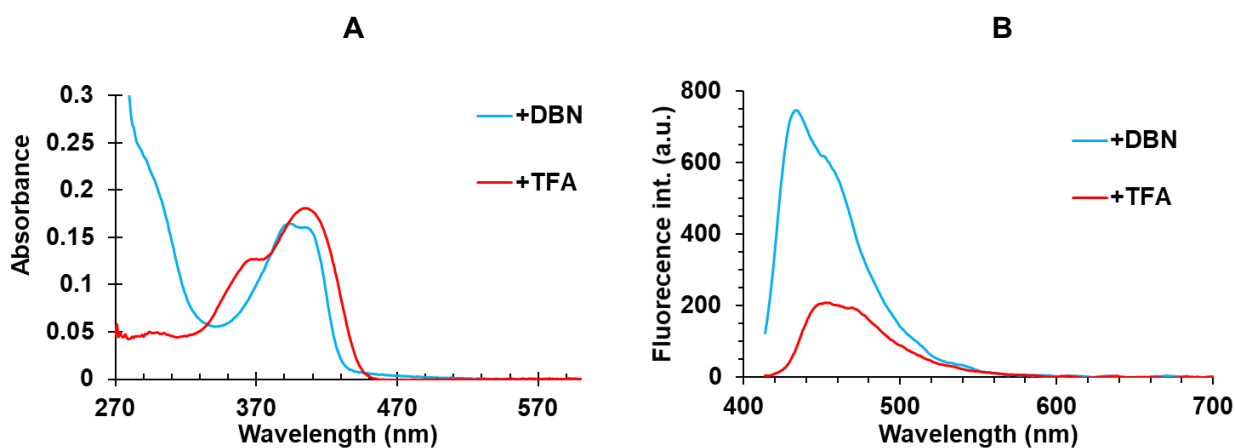

**Figure S13.** Absorption spectra (A) and emission spectra (B) of **6** solution in DMSO ( $C = 10^{-5}$  M) with the addition of DBN (blue line), with the addition of TFA (red line).

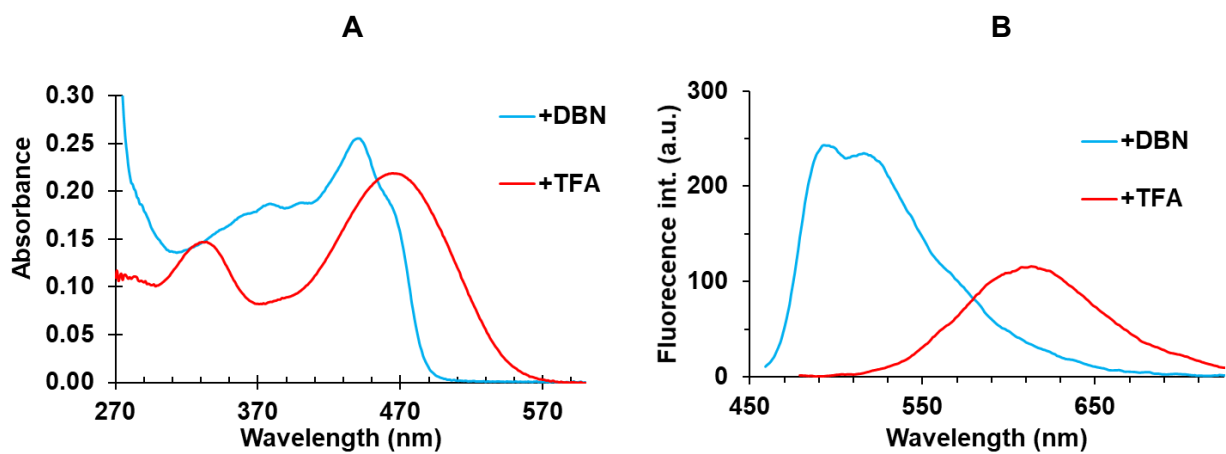

**Figure S14.** Absorption spectra (A) and emission spectra (B) of **7** solution in DMSO ( $C = 10^{-5}$  M) with the addition of DBN (blue line), with the addition of TFA (red line).

## 5. NMR-spectra of compounds 1-7.

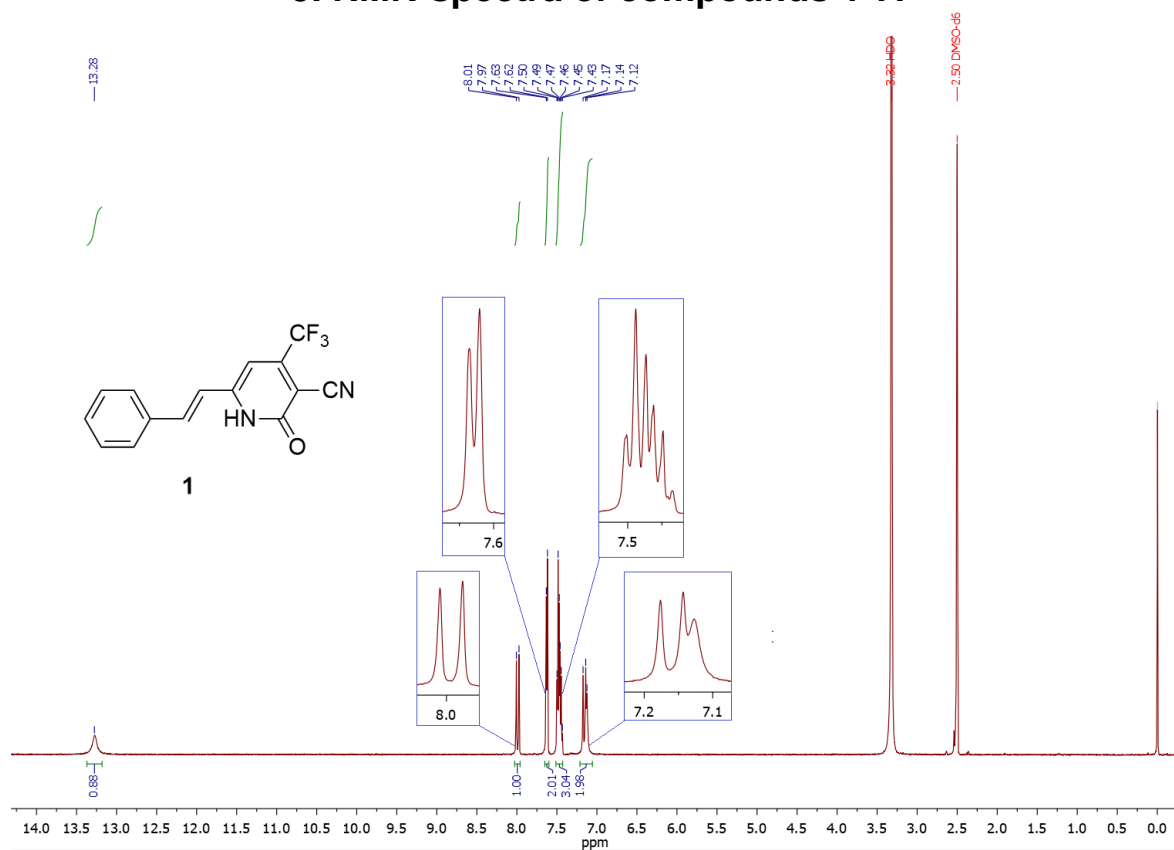

**Figure S15.**  $^1\text{H}$  NMR spectrum of **1** in  $\text{DMSO-}d_6$

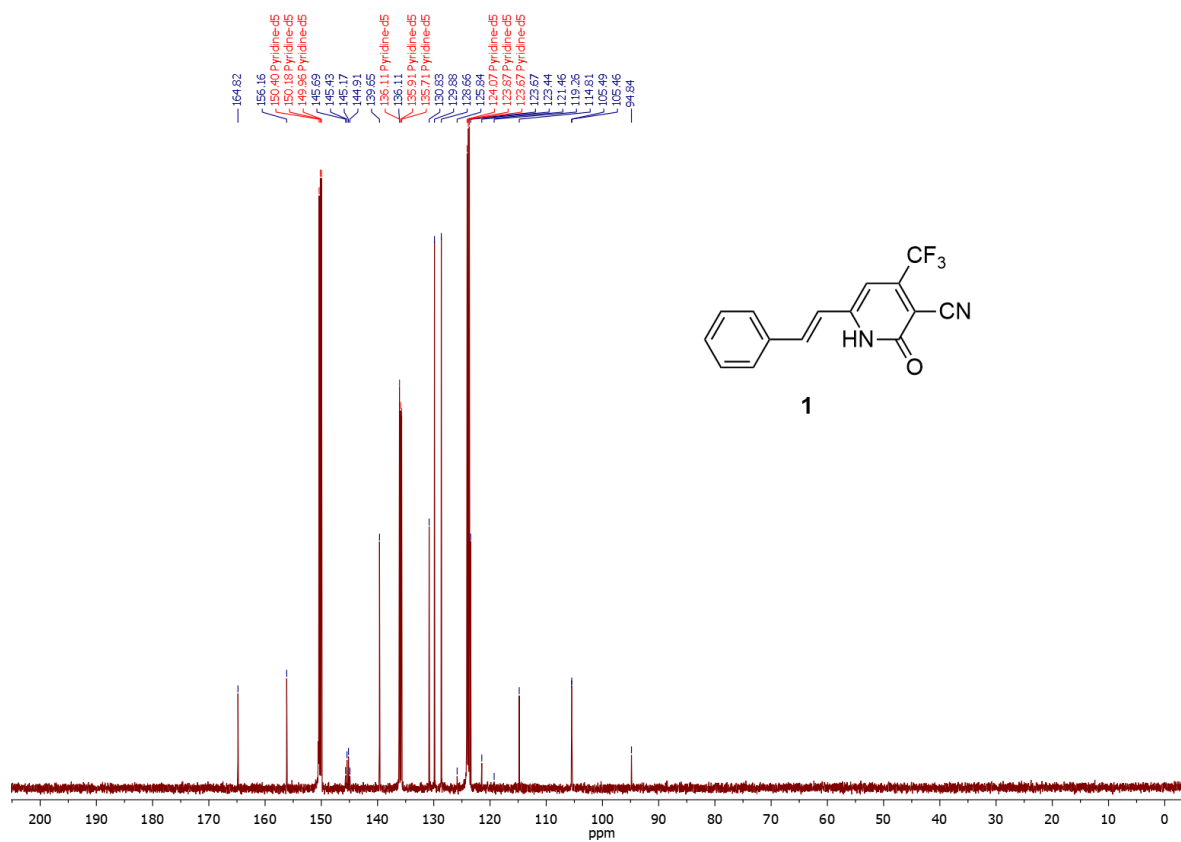

**Figure S16.**  $^{13}\text{C}$  NMR spectrum of **1** in  $\text{Pyridine-}d_5$

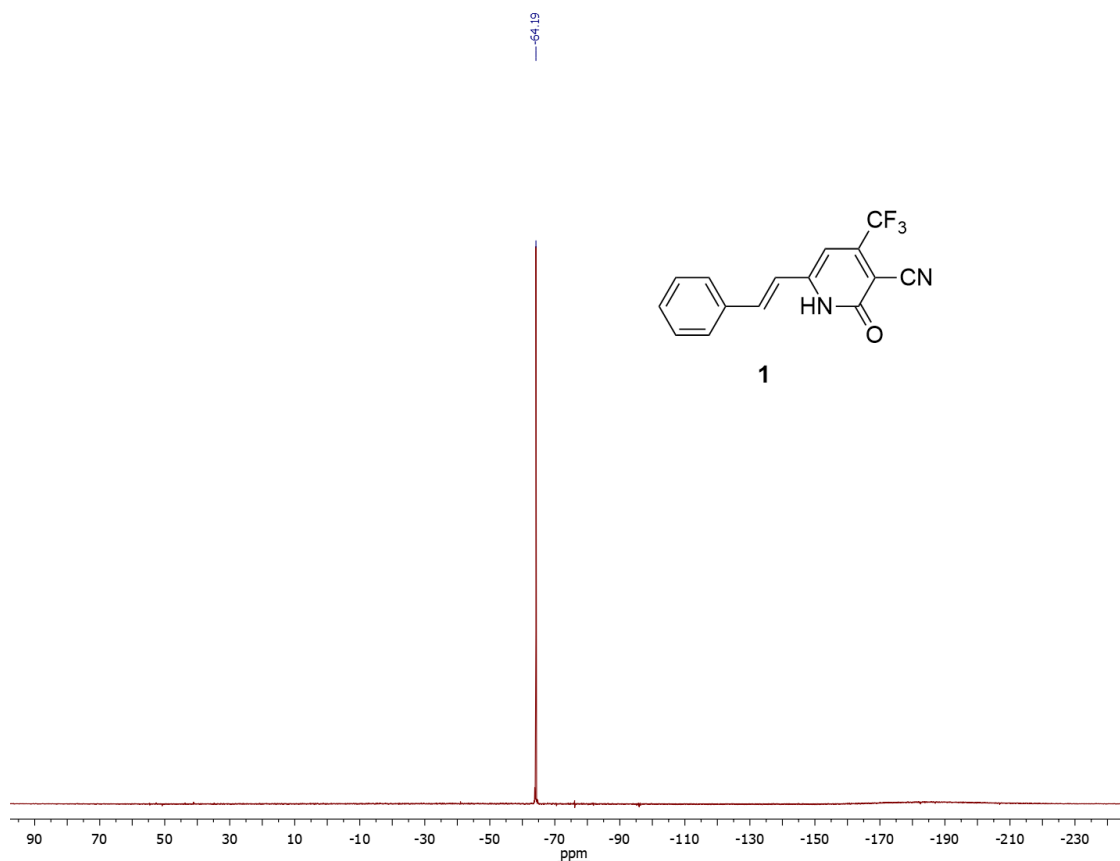

Figure S17. <sup>19</sup>F NMR spectrum of **1** in DMSO-*d*<sub>6</sub>

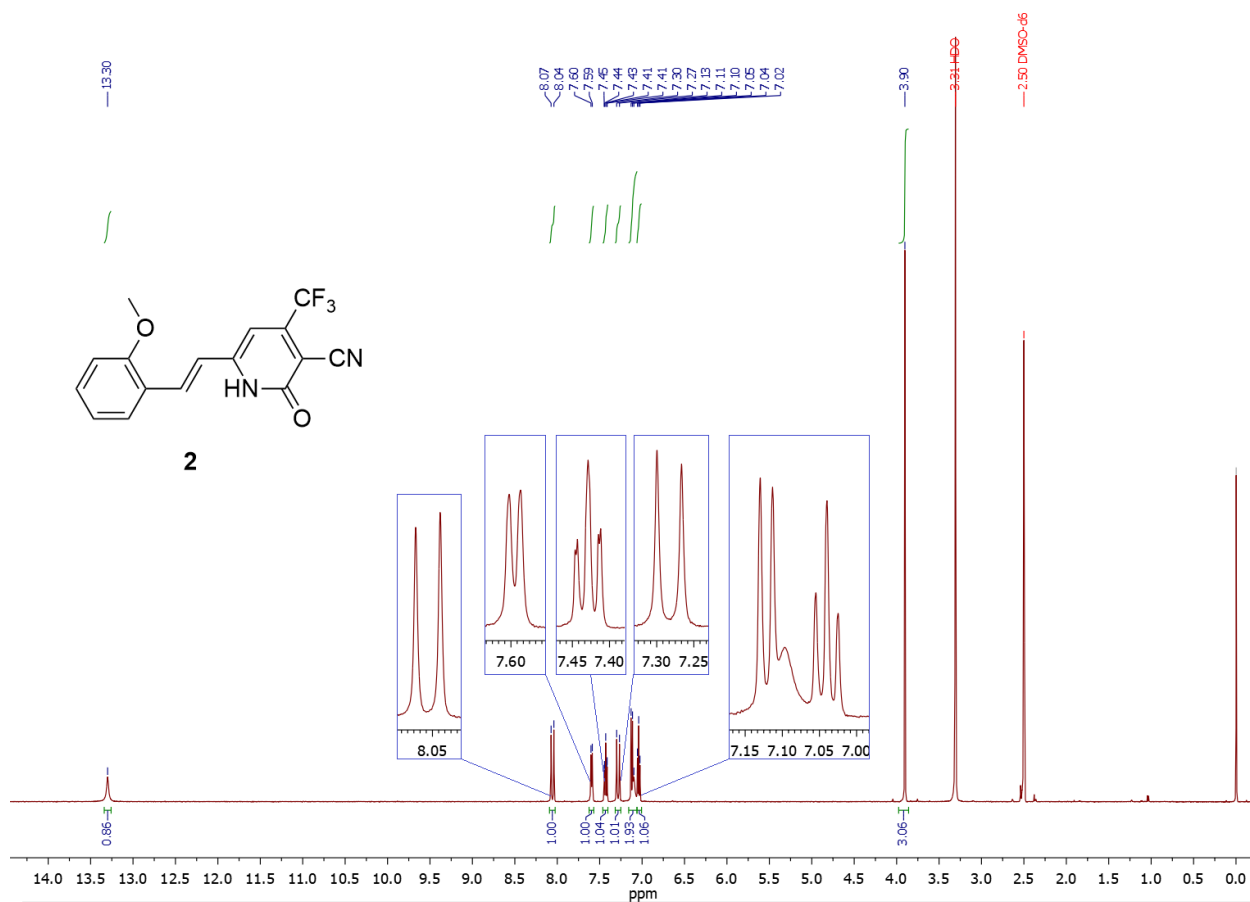

Figure S18. <sup>1</sup>H NMR spectrum of **2** in DMSO-*d*<sub>6</sub>



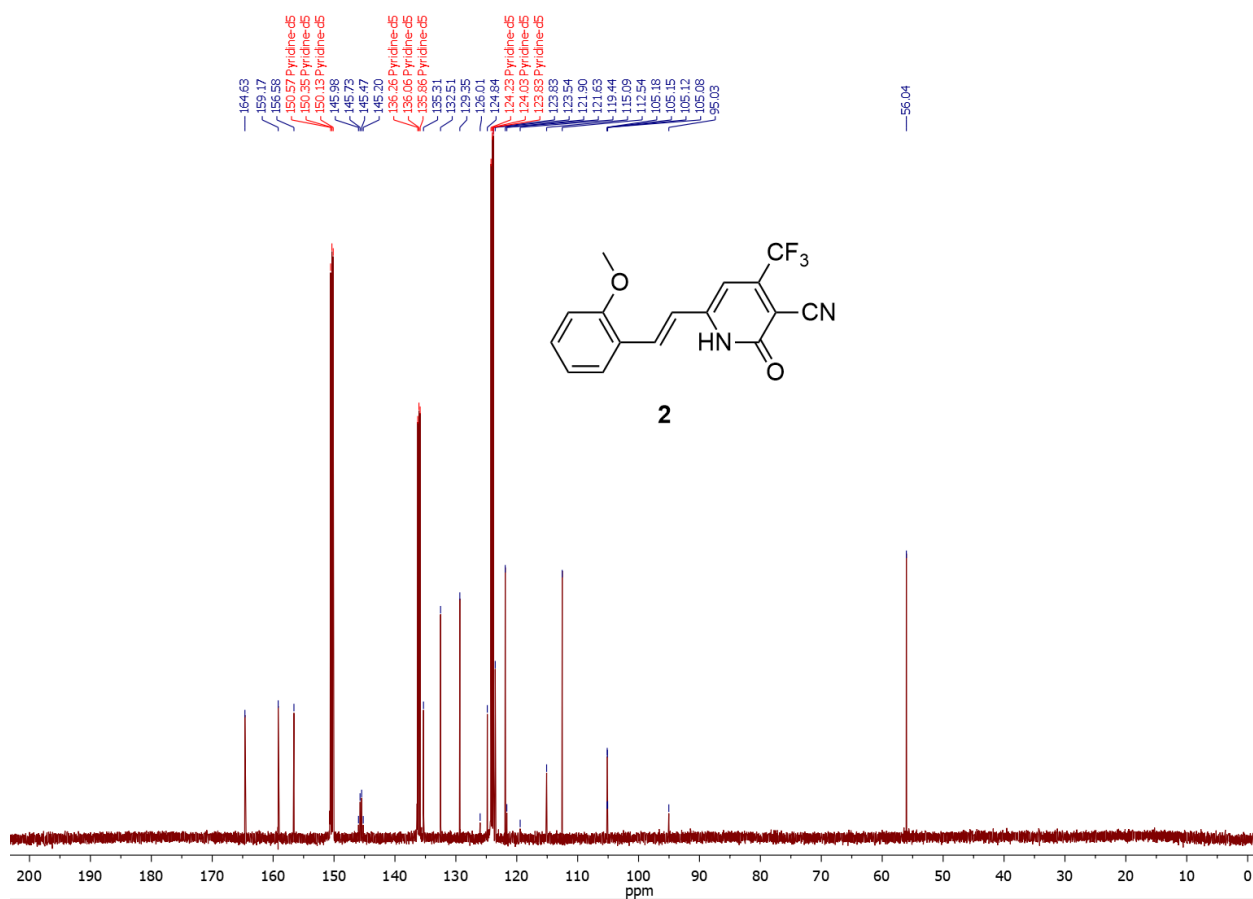

Figure S19. <sup>13</sup>C NMR spectrum of **2** in Pyridine-*d*<sub>5</sub>

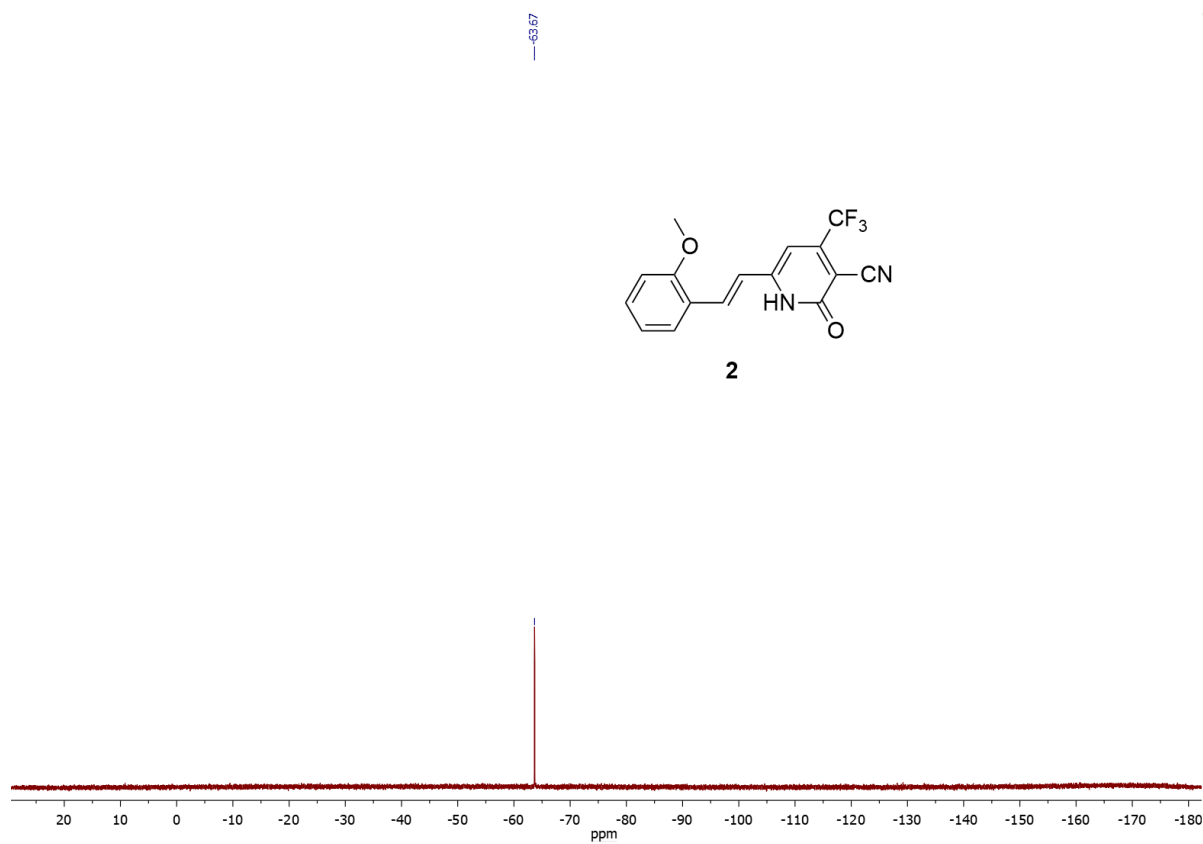

Figure S20. <sup>19</sup>F NMR spectrum of **2** in DMSO-*d*<sub>6</sub>

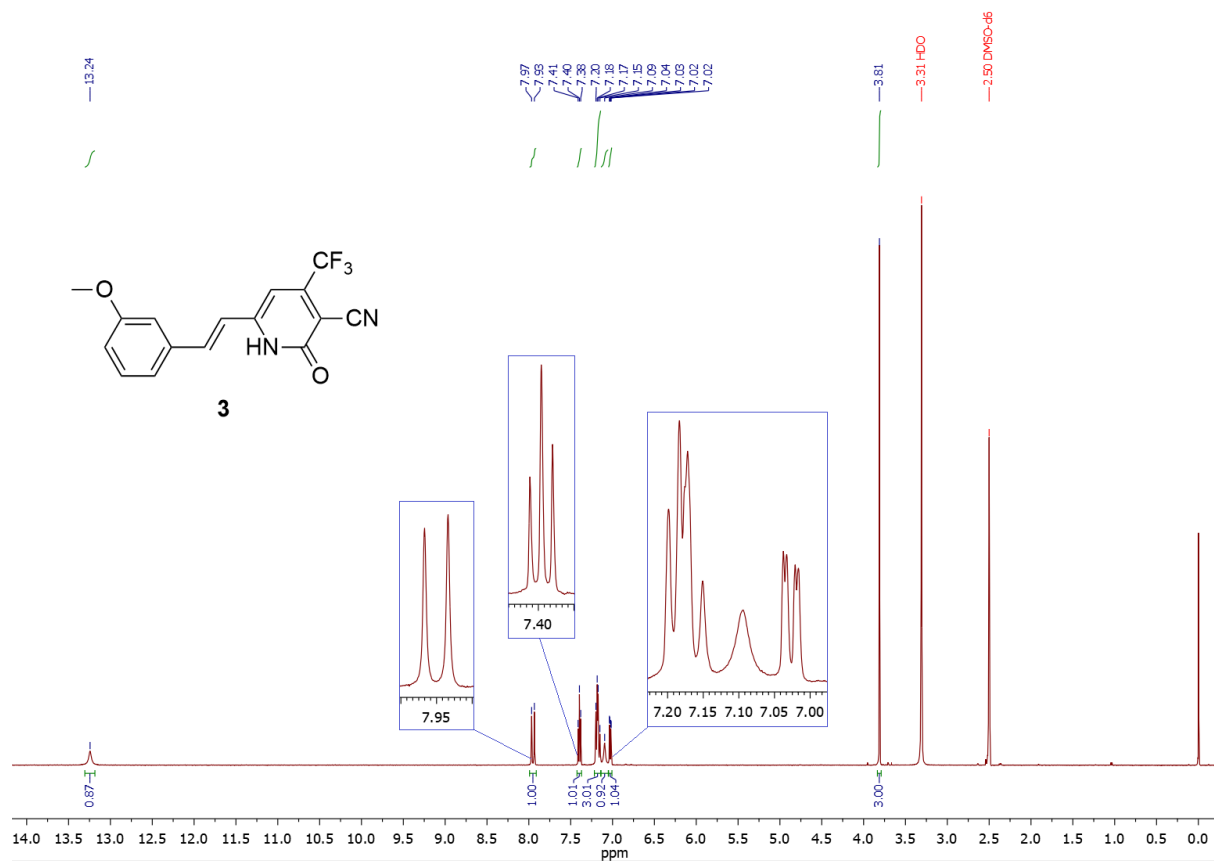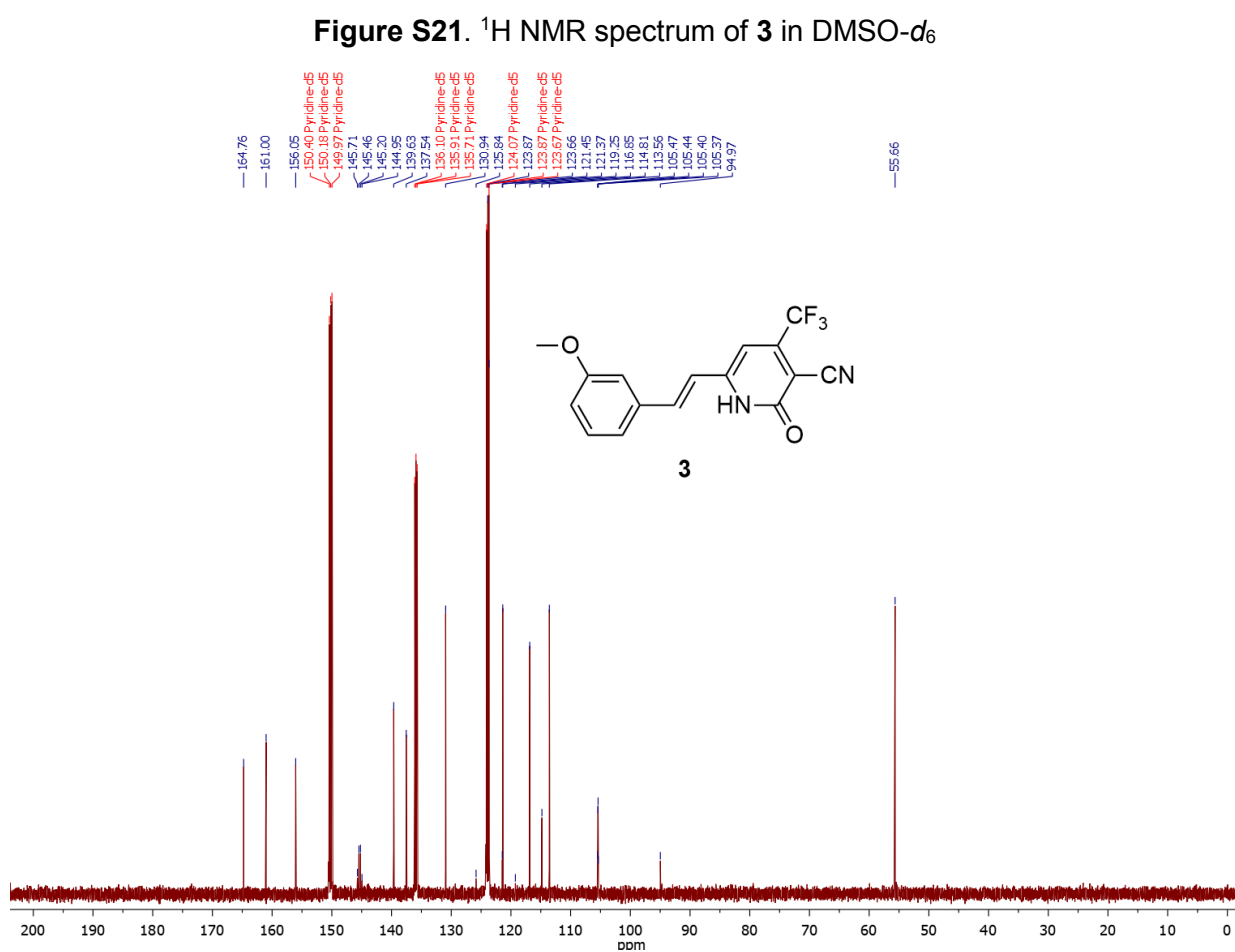

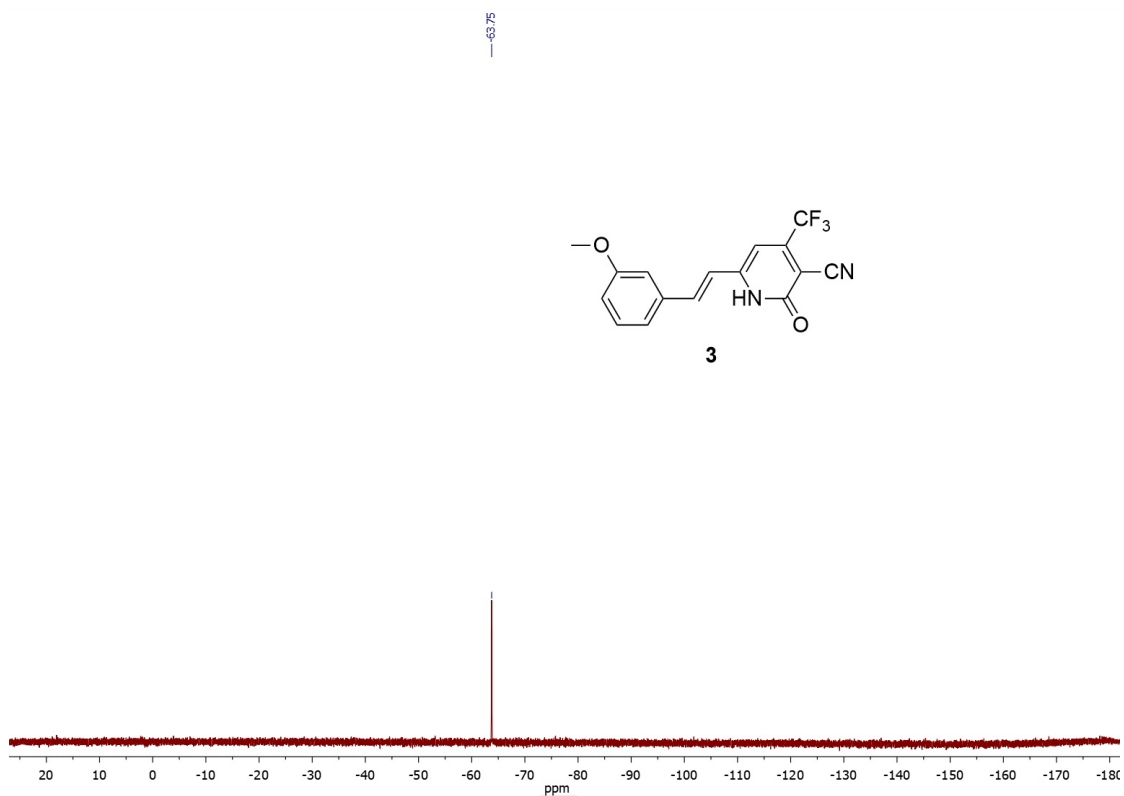

Figure S23.  $^{19}\text{F}$  NMR spectrum of **3** in  $\text{DMSO-}d_6$

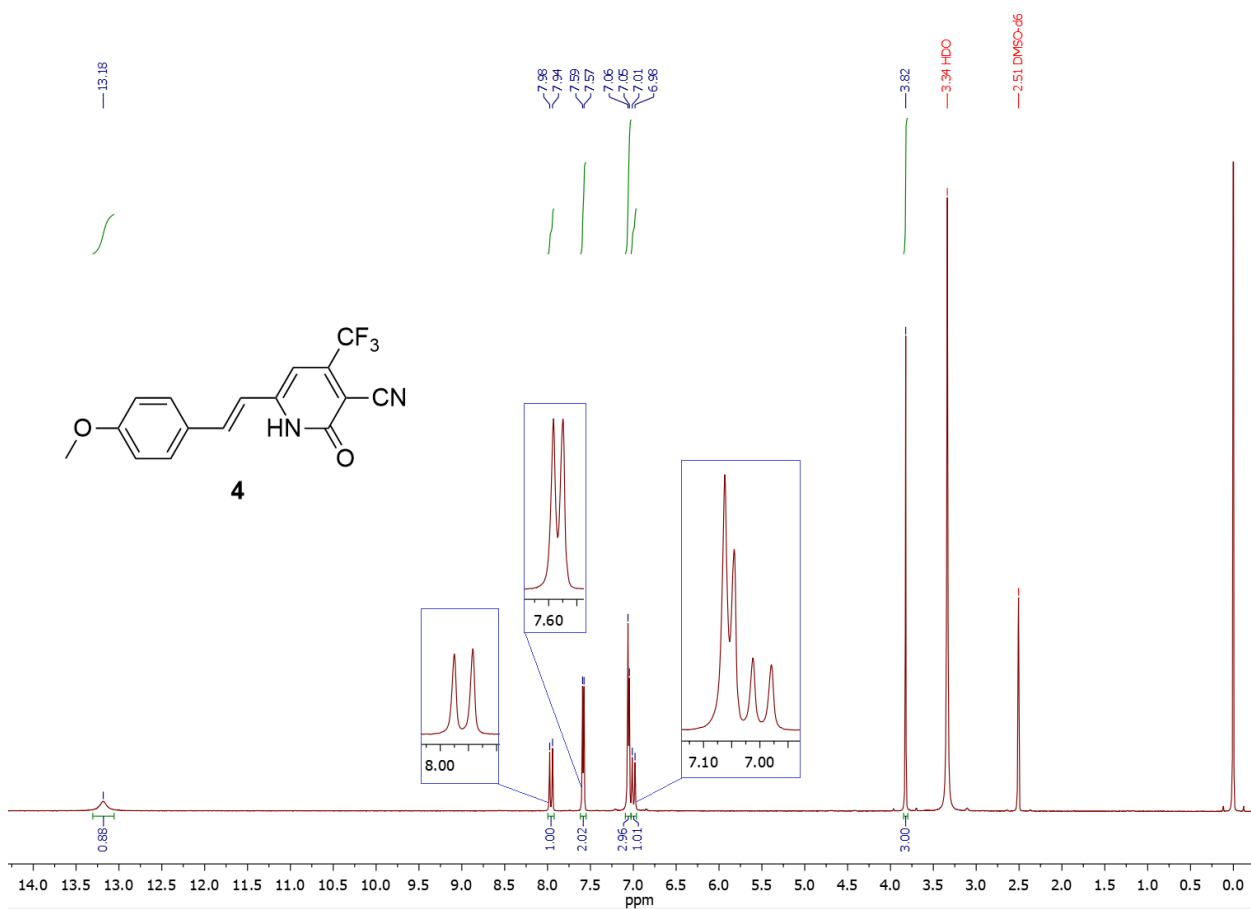

Figure S24.  $^1\text{H}$  NMR spectrum of **4** in  $\text{DMSO-}d_6$

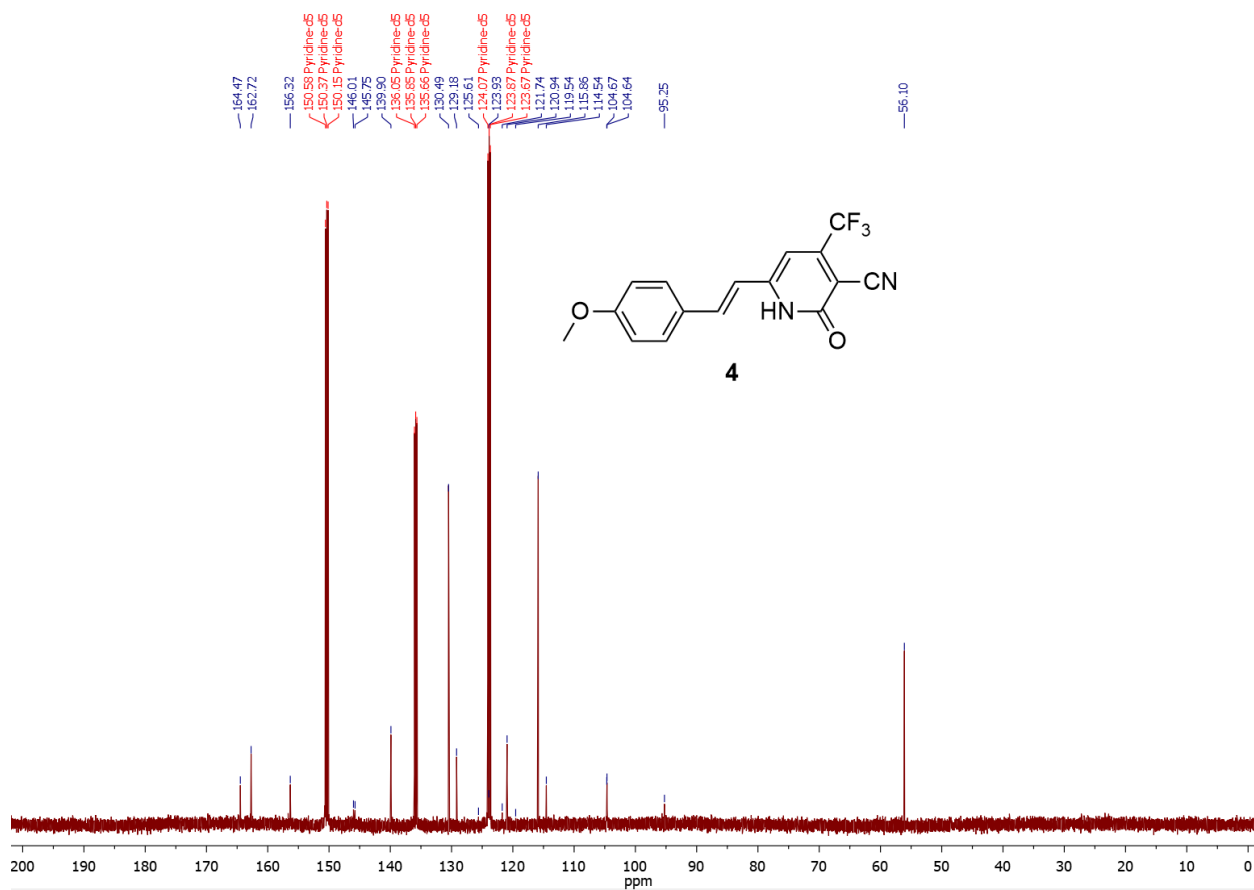

Figure S25. <sup>13</sup>C NMR spectrum of **4** in Pyridine-*d*<sub>5</sub>

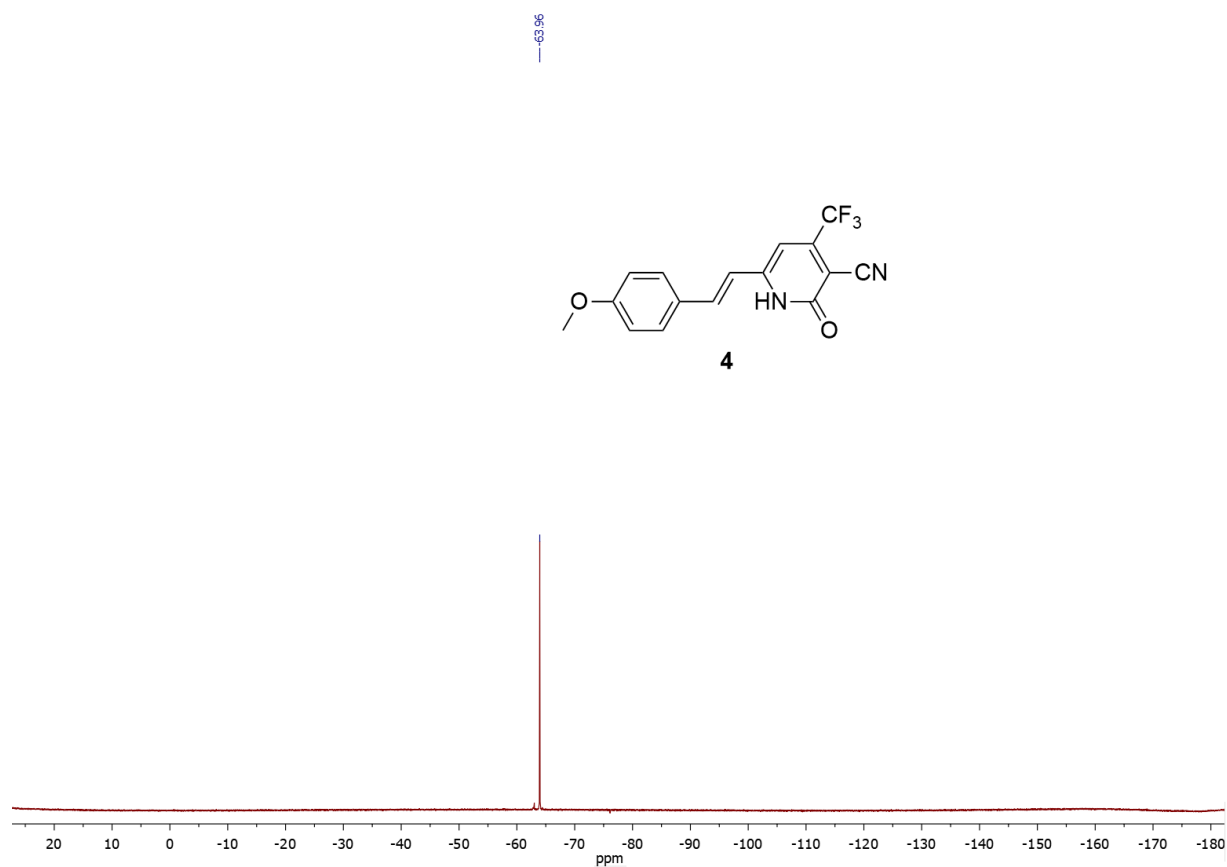

Figure S26. <sup>19</sup>F NMR spectrum of **4** in DMSO-*d*<sub>6</sub>

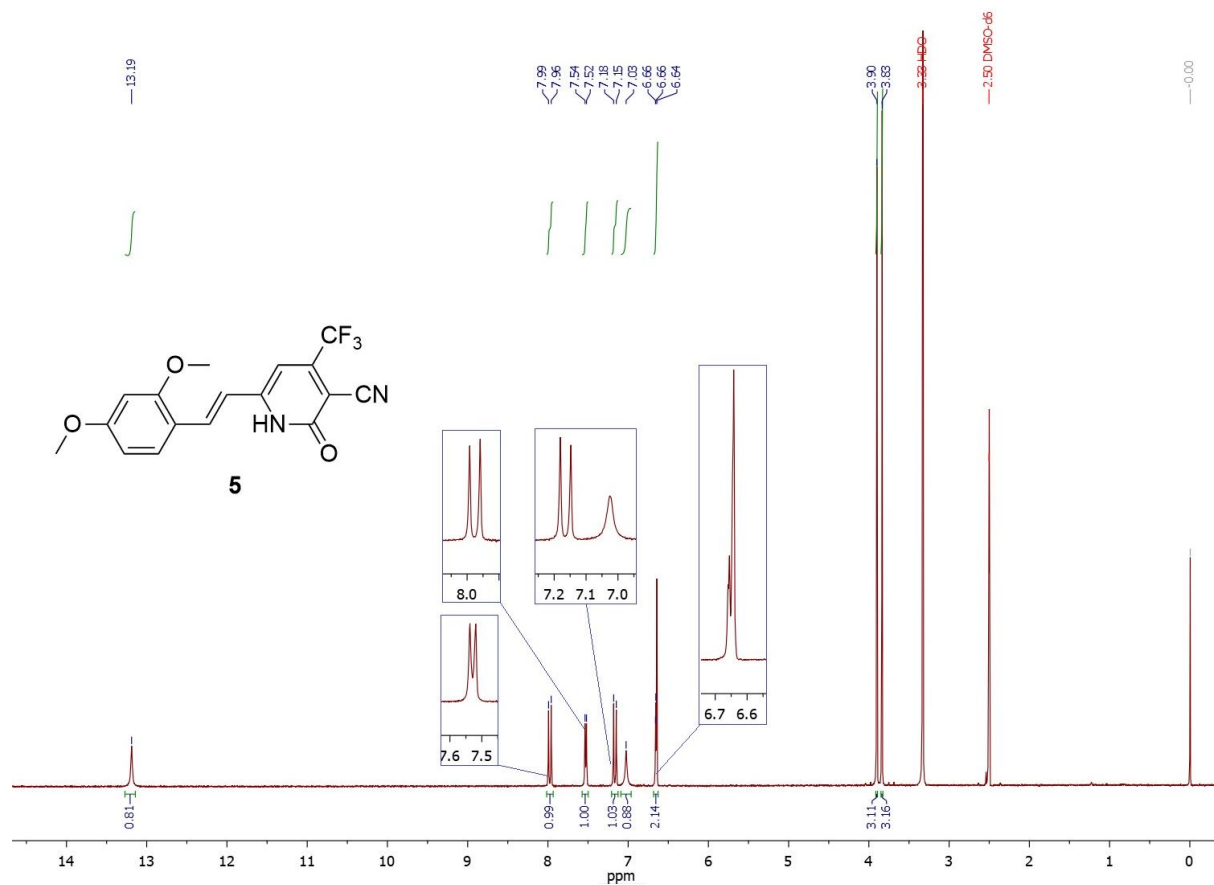

Figure S27. <sup>1</sup>H NMR spectrum of **5** in DMSO-*d*<sub>6</sub>

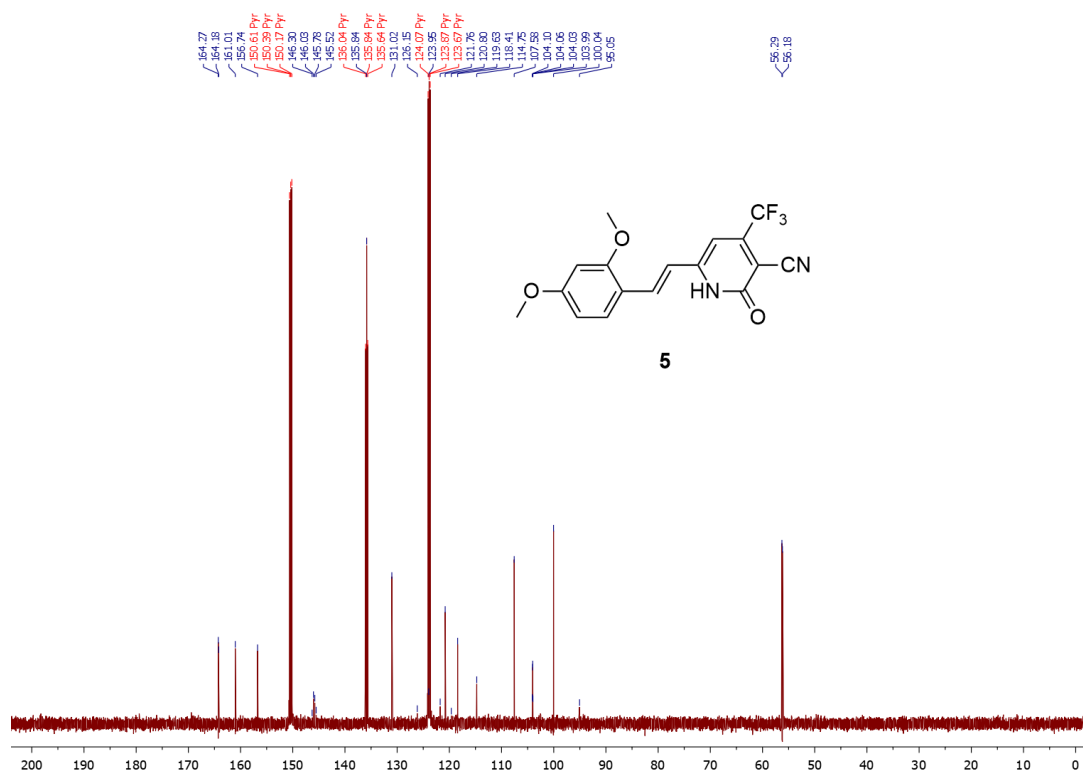

Figure S28. <sup>13</sup>C NMR spectrum of **5** in Pyridine-*d*<sub>5</sub>

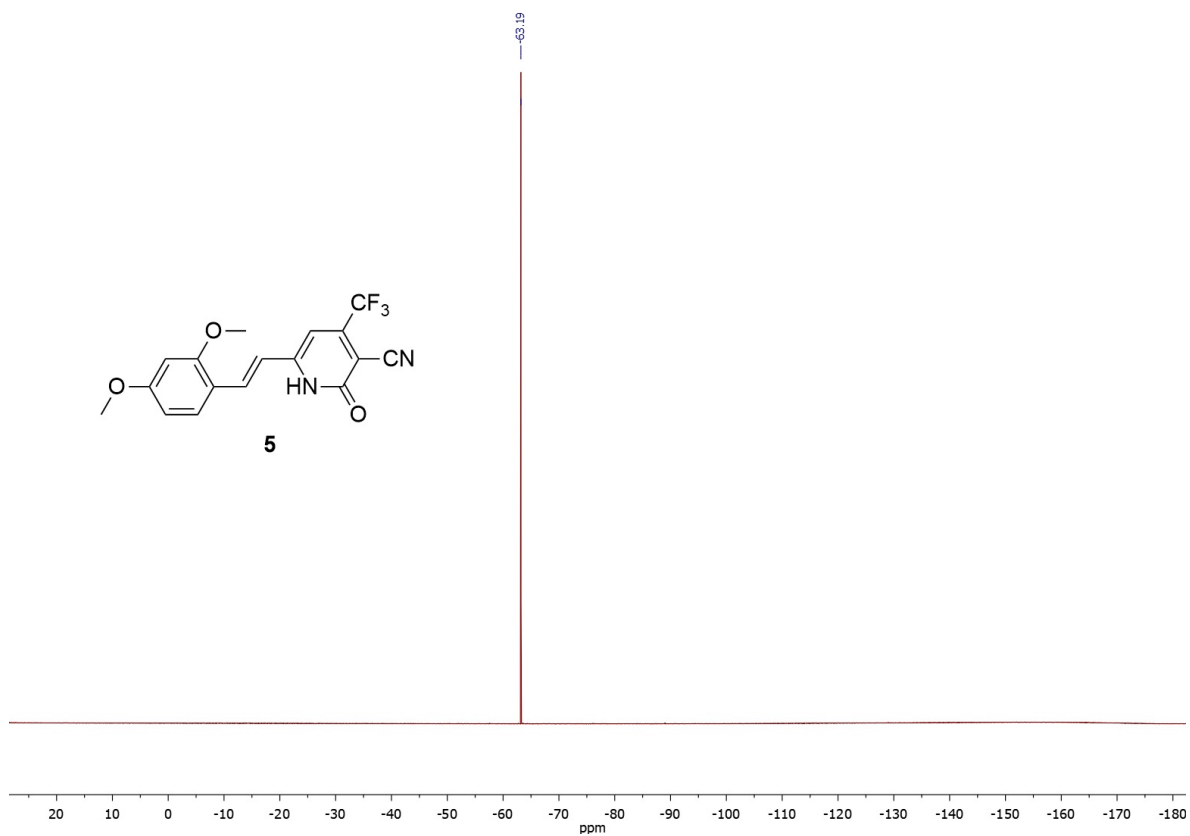

Figure S29. <sup>19</sup>F NMR spectrum of **5** in DMSO-*d*<sub>6</sub>

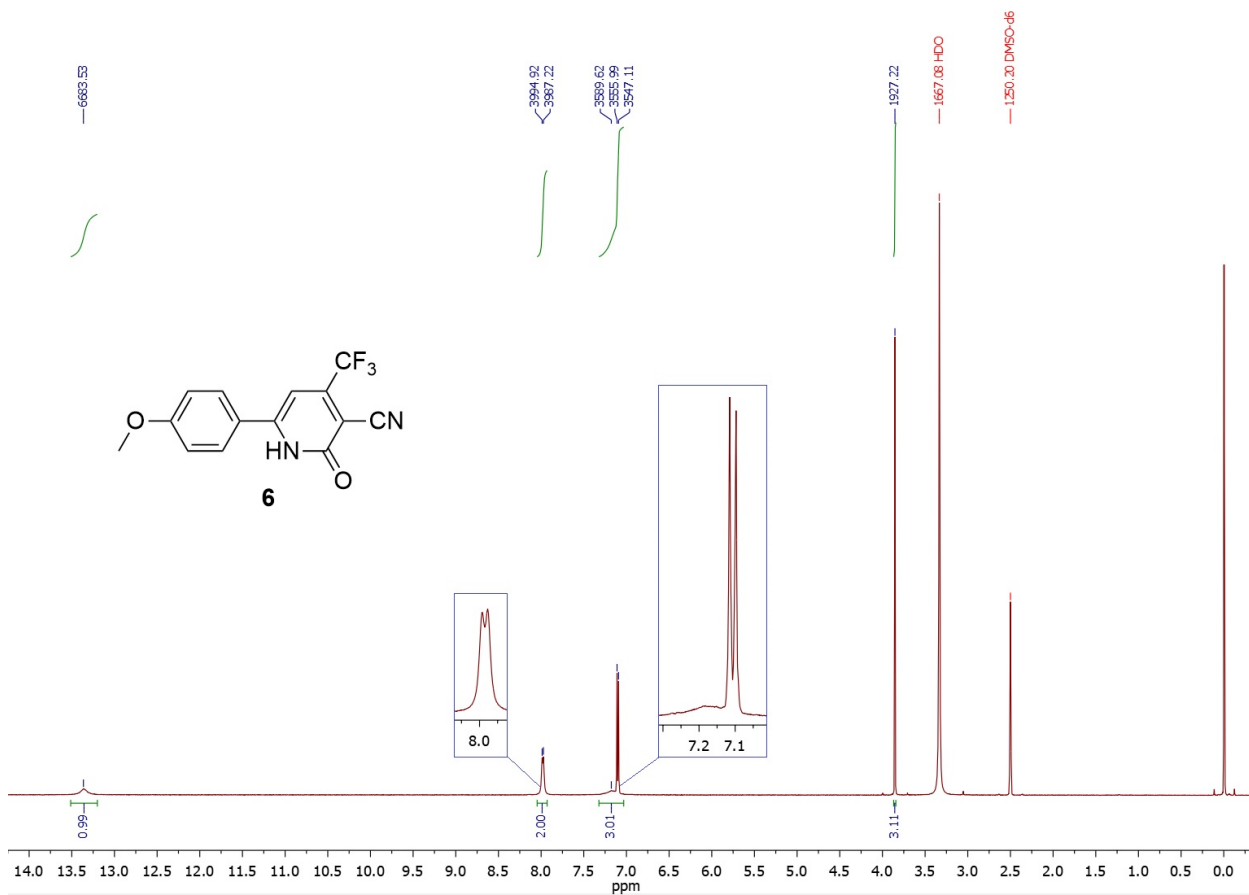

Figure S30. <sup>1</sup>H NMR spectrum of **6** in DMSO-*d*<sub>6</sub>

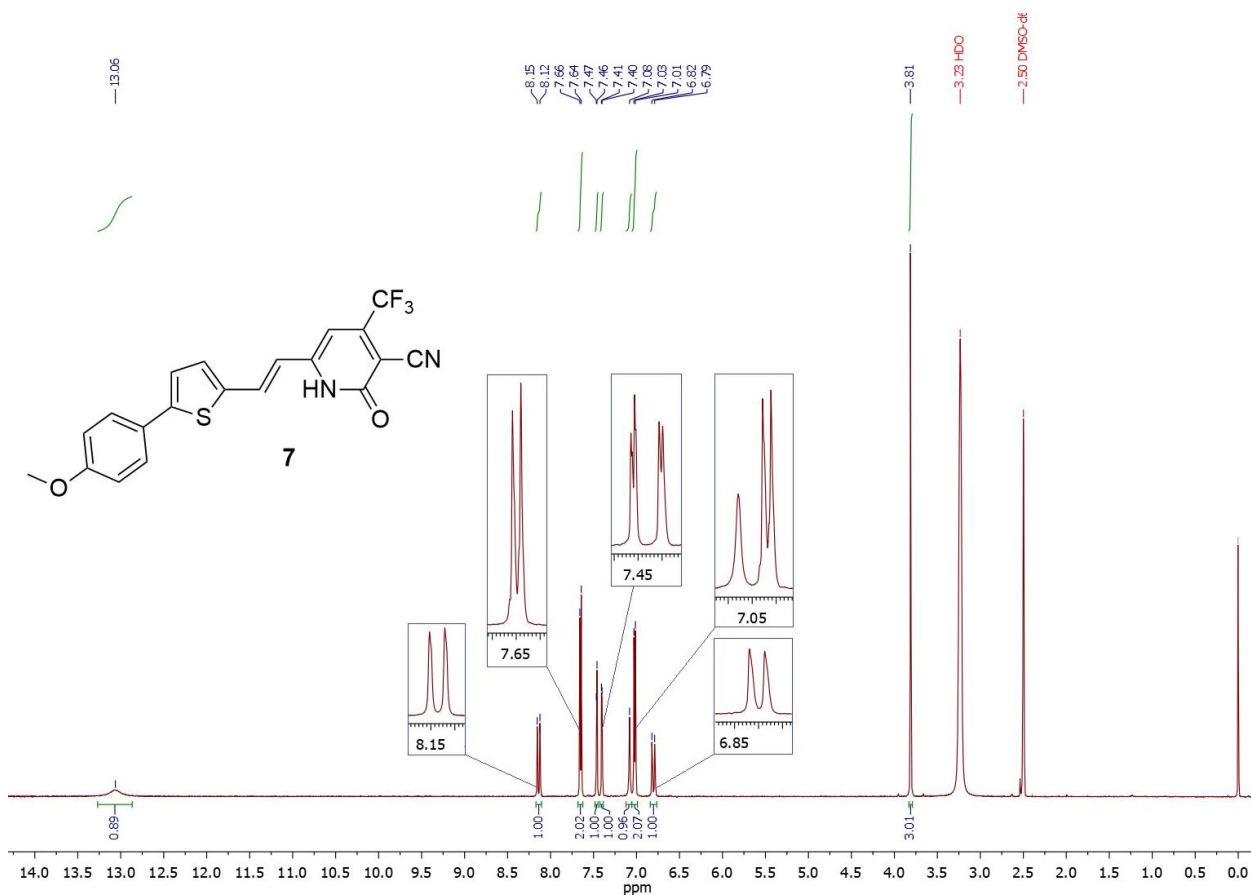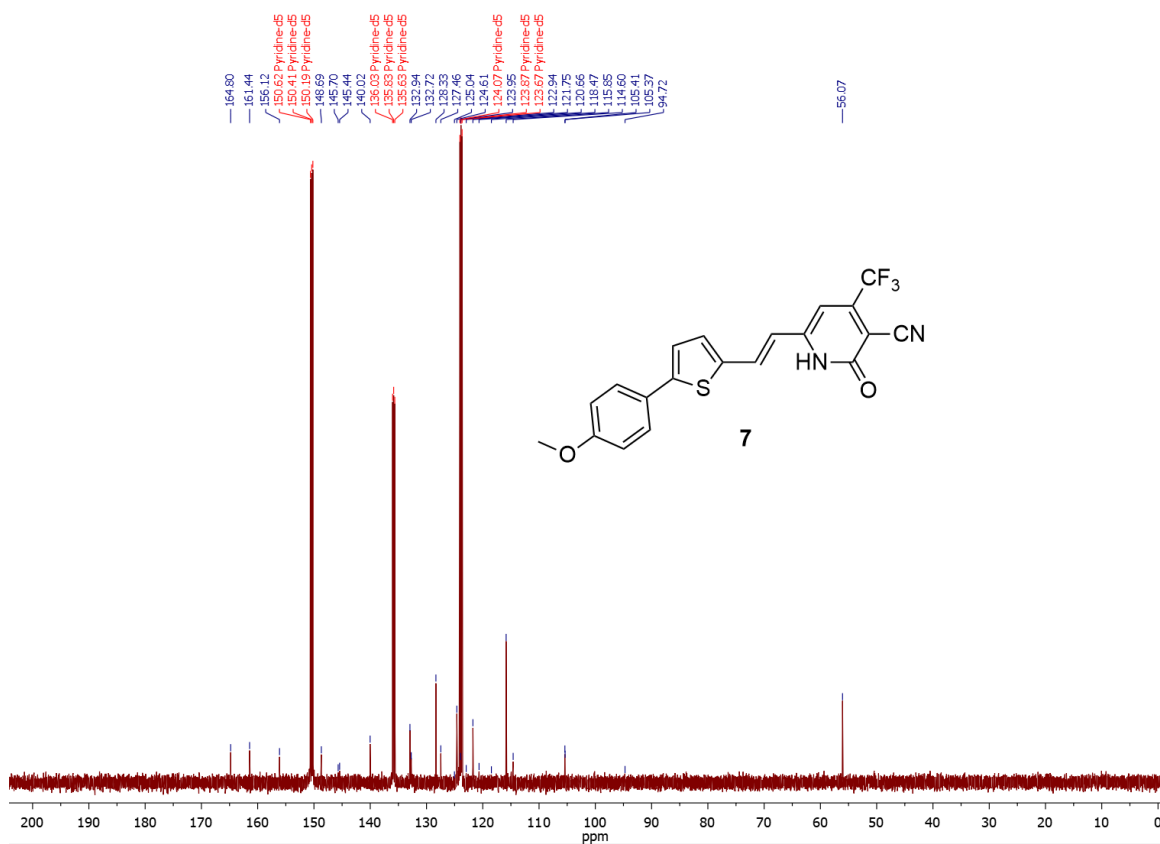

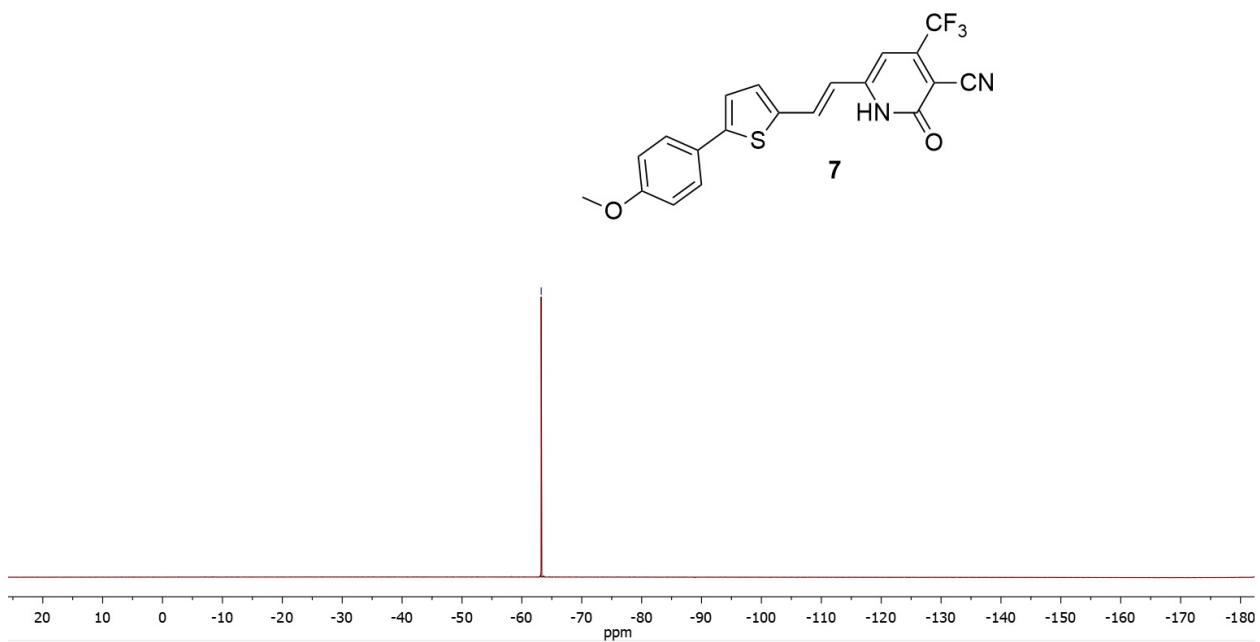

Figure S33. <sup>19</sup>F NMR spectrum of 7 in DMSO-*d*<sub>6</sub>



## 6. Mass spectra of compounds 1-7.

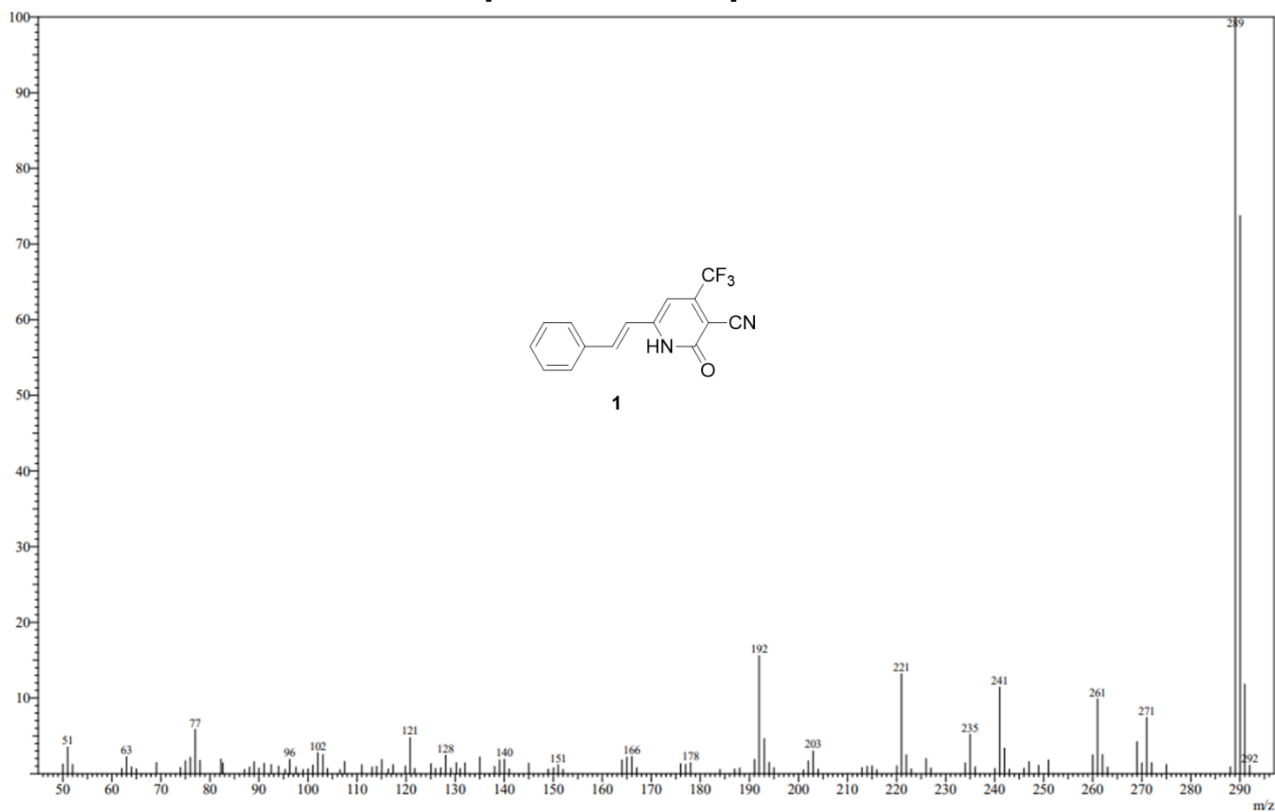

Figure S34. Mass-spectrum of compound 1.

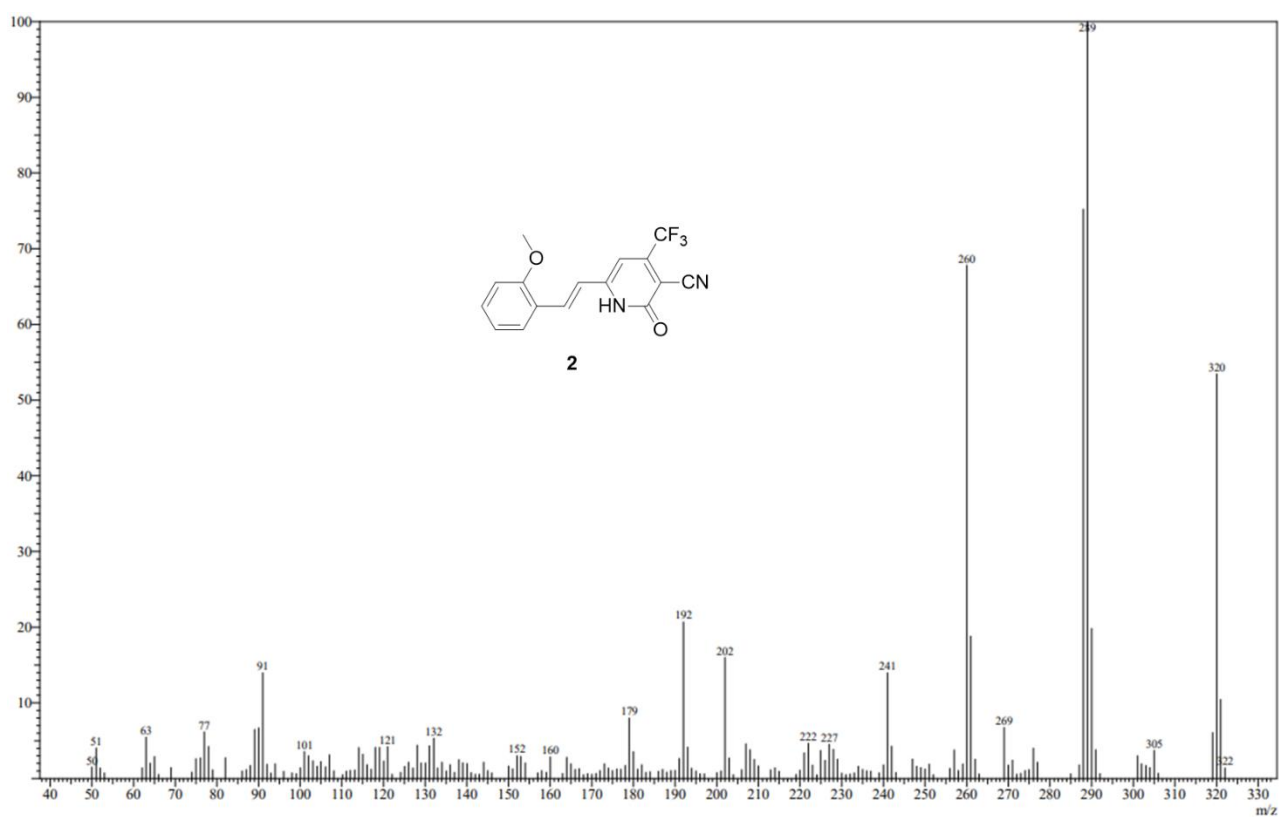

Figure S35. Mass-spectrum of compound 2.

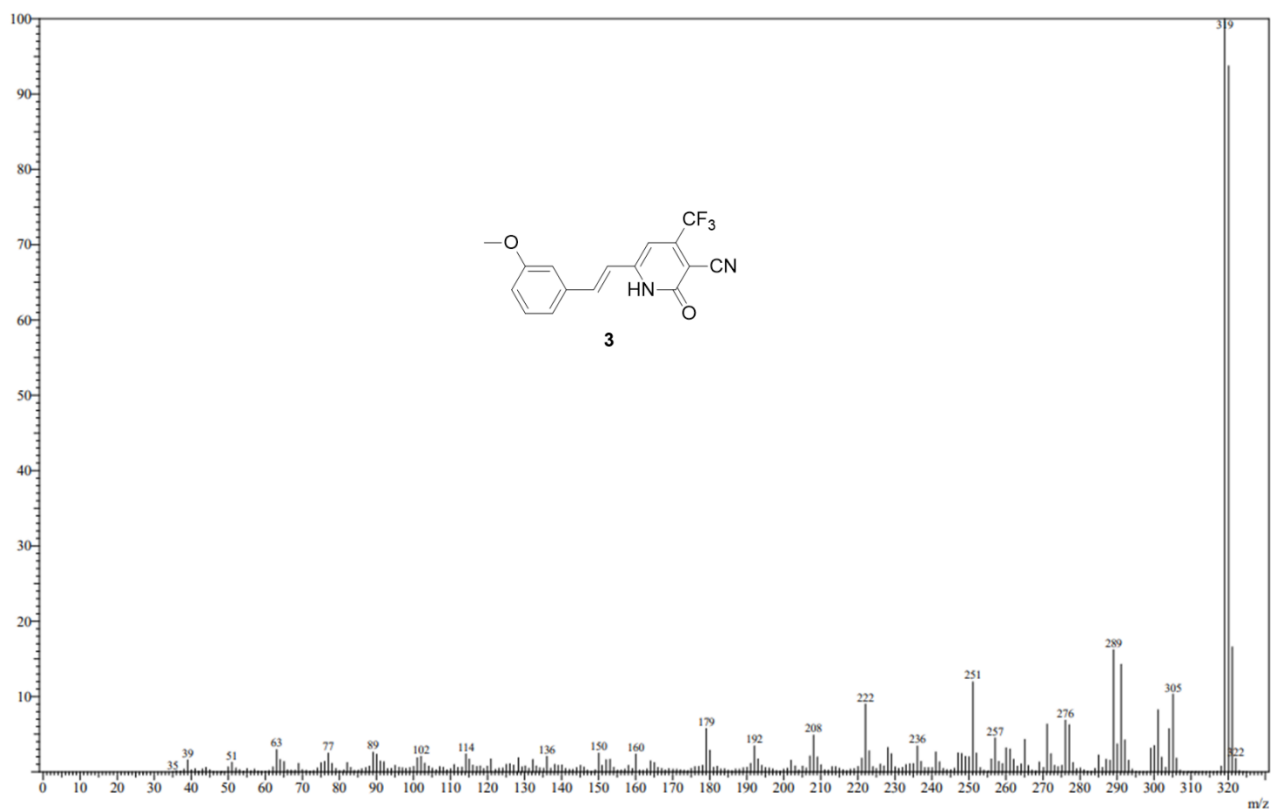

Figure S36. Mass-spectrum of compound 3.

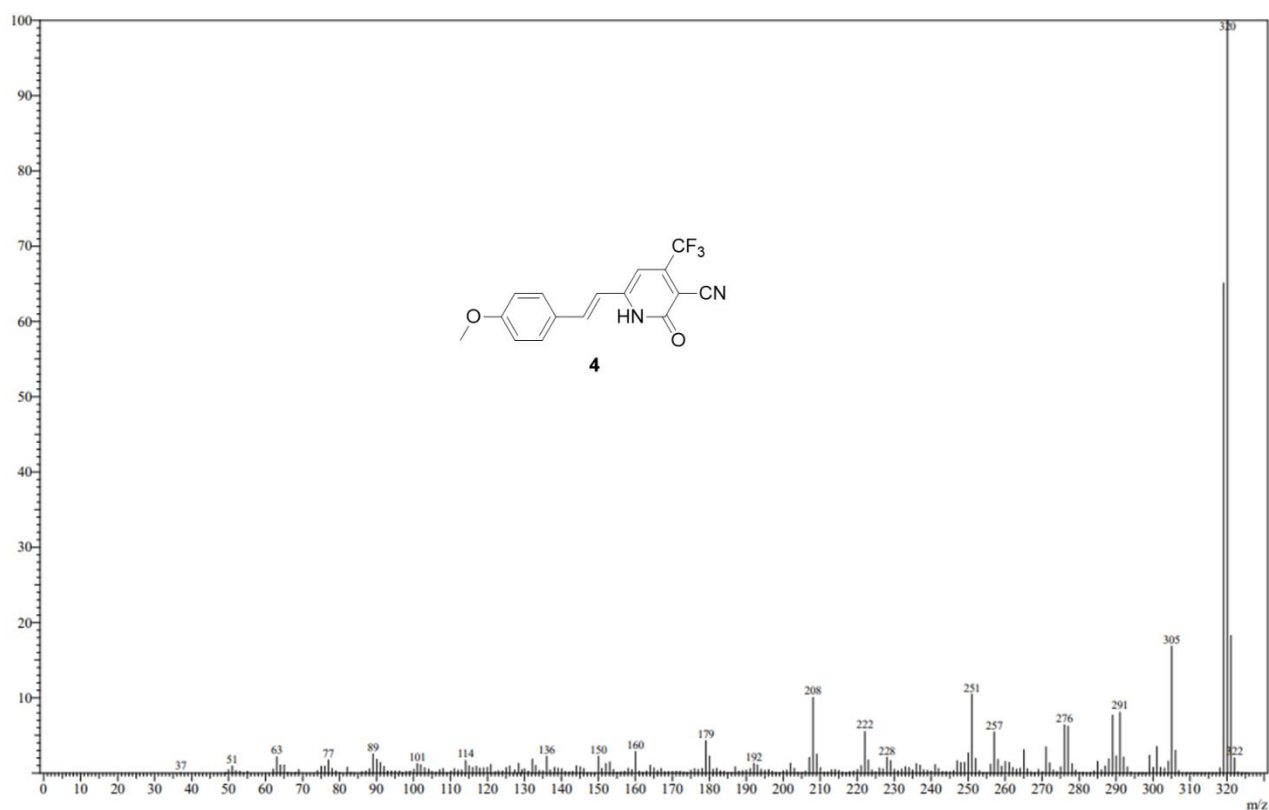

Figure S37. Mass-spectrum of compound 4.

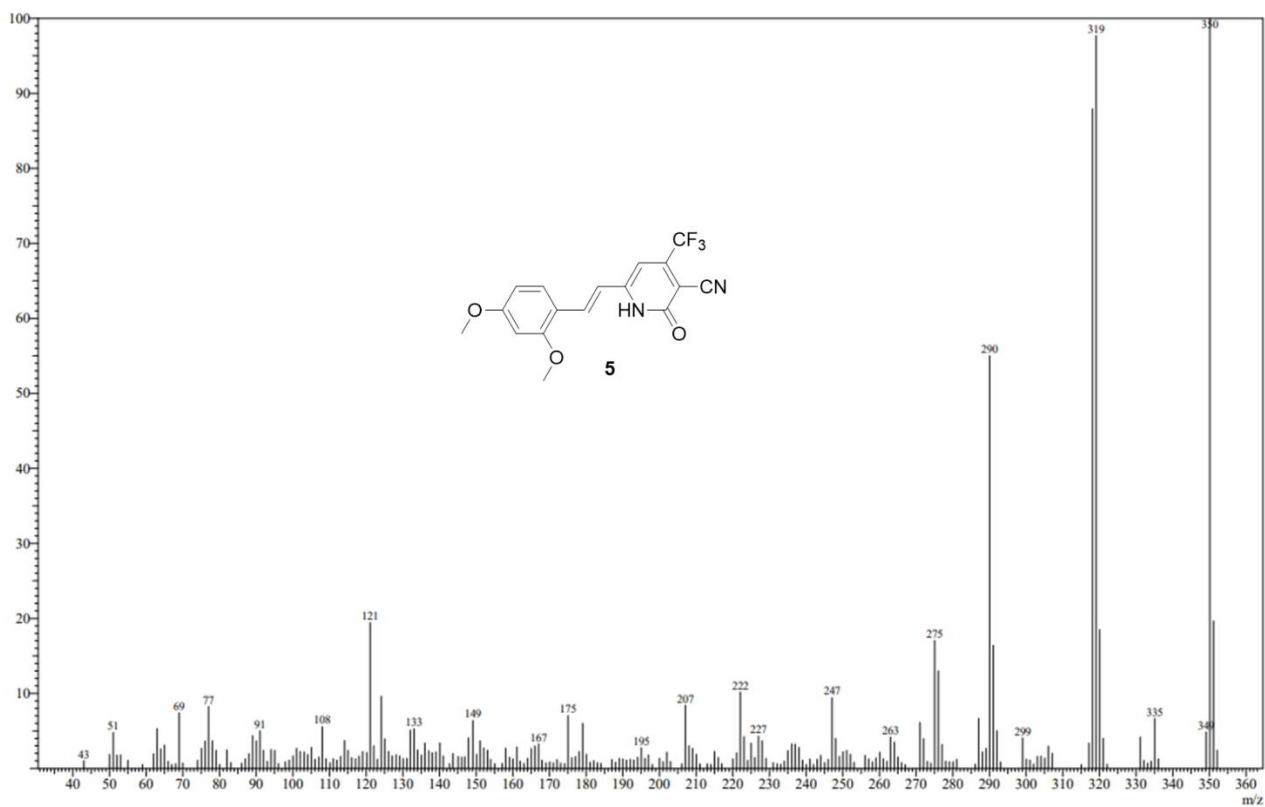

Figure S38. Mass-spectrum of compound 5.

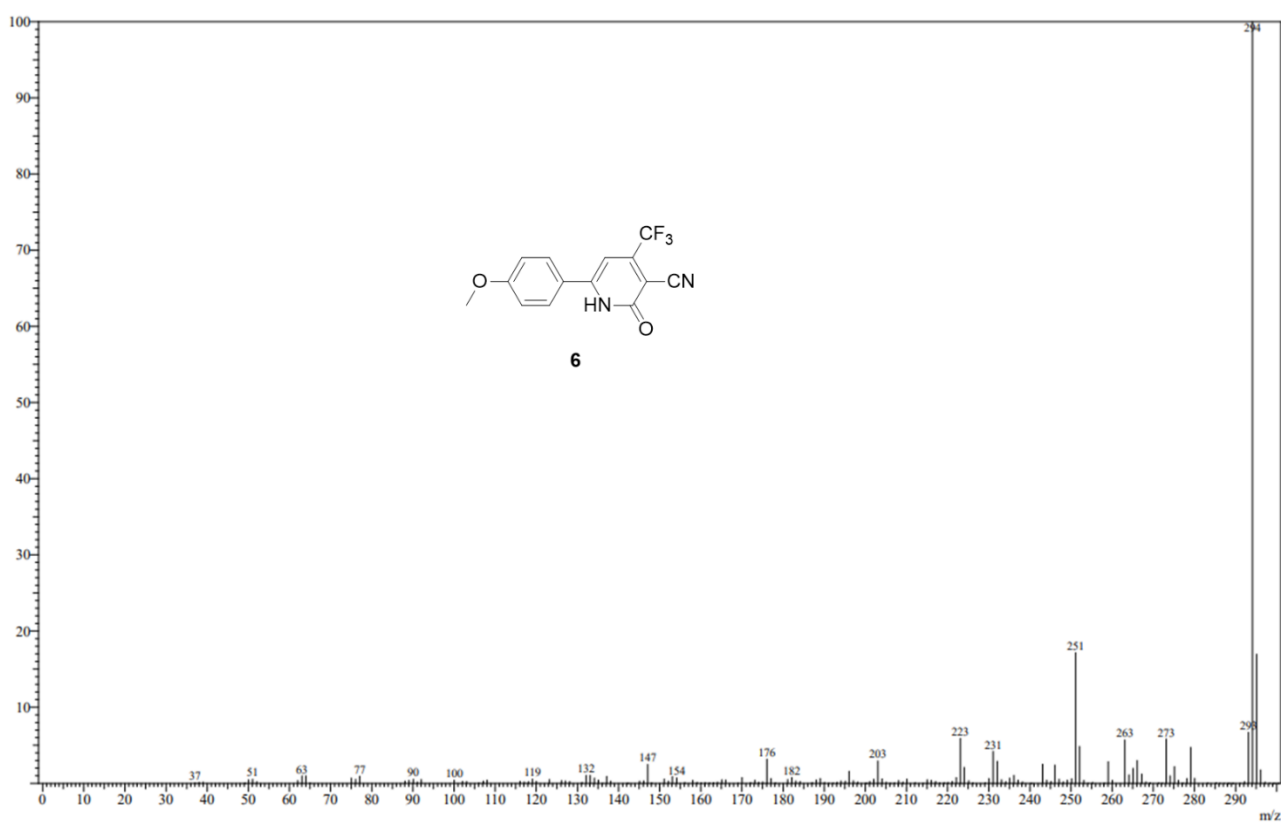

Figure S39. Mass-spectrum of compound 6.

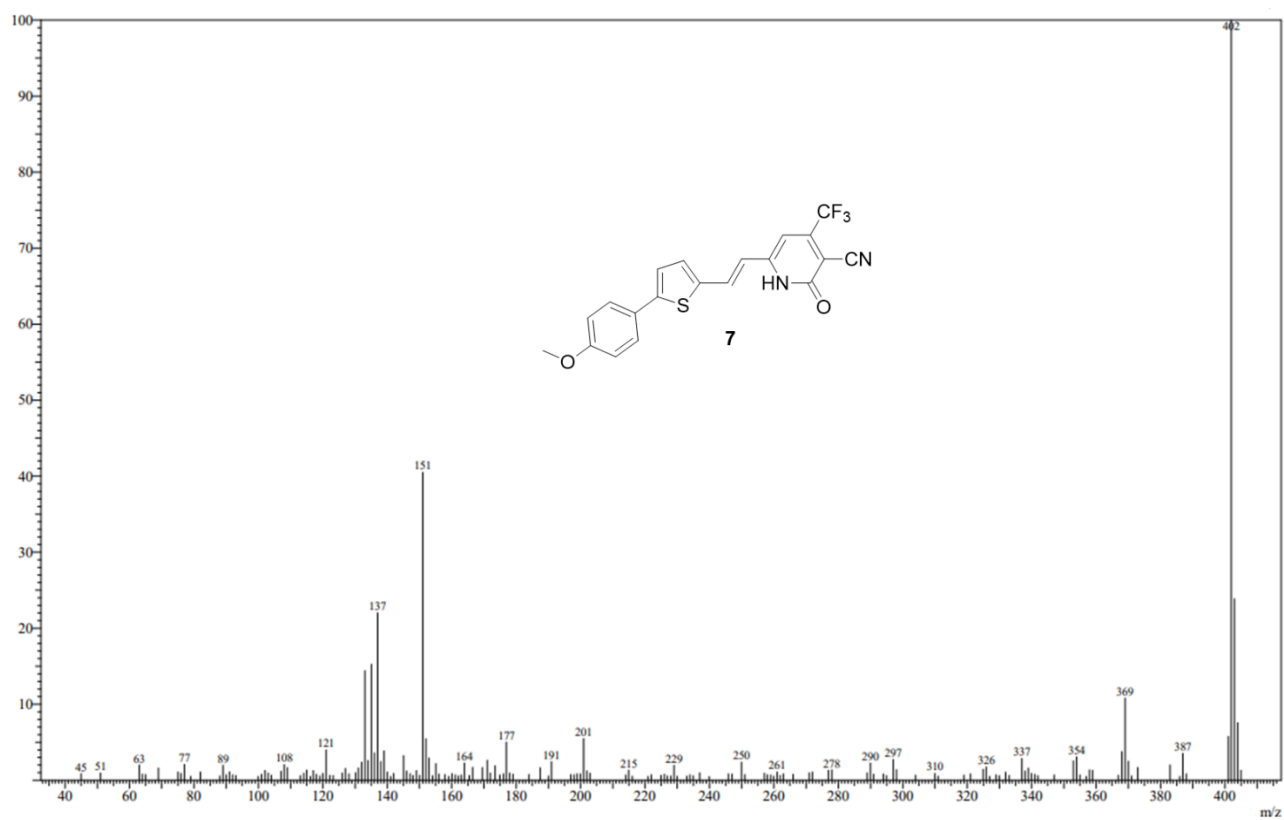

**Figure S40.** Mass-spectrum of compound 7.

## 7. References.

- [1] P. G. Seybold, M. Gouterman and J. Callis, *Photochem. Photobiol.*, 1969, **9**, 229–242.
- [2] M. J. Frisch, G. W. Trucks, H. B. Schlegel, G. E. Scuseria, M. A. Robb, J. R. Cheeseman, G. Scalmani, V. Barone, B. Mennucci, G. A. Petersson, H. Nakatsuji, M. Caricato, X. Li, H. Hratchian, A. F. Izmaylov, J. Bloino, G. Zheng, J. L. Sonnenberg, M. Hada, M. Ehara, K. Toyota, R. Fukuda, J. Hasegawa, M. Ishida, T. Nakajima, Y. Honda, O. Kitao, H. Nakai, T. Vreven, J. A. Montgomery Jr., J. E. Peralta, F. Ogliaro, M. Bearpark, J. J. Heyd, E. Brothers, K. N. Kudin, V. N. Staroverov, R. Kobayashi, J. Normand, K. Raghavachari, A. Rendell, J. C. Burant, S. S. Iyengar, J. Tomasi, M. Cossi, N. Rega, J. M. Millam, M. Klene, J. E. Knox, J. B. Cross, V. Bakken, C. Adamo, J. Jaramillo, R. Gomperts, R. E. Stratmann, O. Yazyev, A. J. Austin, R. Cammi, C. Pomelli, J. W. Ochterski, R. Martin, K. Morokuma, V. G. Zakrzewski, G. A. Voth, P. Salvador, J. J. Dannenberg, S. Dapprich, A. D. Daniels, Ö. Farkas, J. B. Foresman, J. V. Ortiz, J. Cioslowski and D. J. Fox, *Gaussian 09, revision D.01*, Gaussian, Inc., Wallingford, CT, 2009.
